# Supplementary material for: Emotional reserve and prolonged post-concussive symptoms and disability: a Swedish prospective 1-year mild traumatic brain injury cohort study
Source: PubMed Central journal article supplement — BMJ Open. 2018 Jul 6;8(7):e020884. doi: 10.1136/bmjopen-2017-020884 (PMC6042551; doi:10.1136/bmjopen-2017-020884), 2018-07-06
Supplement: bmjopen-2017-020884.draft_revisions.pdf [file bmjopen-2017-020884.draft_revisions.pdf]

# BMJ Open

BMJ Open is committed to open peer review. As part of this commitment we make the peer review history of every article we publish publicly available.

When an article is published we post the peer reviewers' comments and the authors' responses online. We also post the versions of the paper that were used during peer review. These are the versions that the peer review comments apply to.

The versions of the paper that follow are the versions that were submitted during the peer review process. They are not the versions of record or the final published versions. They should not be cited or distributed as the published version of this manuscript.

BMJ Open is an open access journal and the full, final, typeset and author-corrected version of record of the manuscript is available on our site with no access controls, subscription charges or pay-per-view fees (<http://bmjopen.bmj.com>).

If you have any questions on BMJ Open's open peer review process please email [info.bmjopen@bmj.com](mailto:info.bmjopen@bmj.com)

# BMJ Open

## Emotional reserve and prolonged post-concussion symptoms and disability: a prospective one-year mild traumatic brain injury cohort study

|                                 |                                                                                                                                                                                                                                                                                                                                                                                                                                                                             |
|---------------------------------|-----------------------------------------------------------------------------------------------------------------------------------------------------------------------------------------------------------------------------------------------------------------------------------------------------------------------------------------------------------------------------------------------------------------------------------------------------------------------------|
| Journal:                        | <i>BMJ Open</i>                                                                                                                                                                                                                                                                                                                                                                                                                                                             |
| Manuscript ID                   | bmjopen-2017-020884                                                                                                                                                                                                                                                                                                                                                                                                                                                         |
| Article Type:                   | Research                                                                                                                                                                                                                                                                                                                                                                                                                                                                    |
| Date Submitted by the Author:   | 30-Nov-2017                                                                                                                                                                                                                                                                                                                                                                                                                                                                 |
| Complete List of Authors:       | Oldenburg, Christian; Karolinska Institutet, Department of Clinical Sciences, Danderyd Hospital;<br>Lundin, Anders; Dizziness Center, Neuropsychiatry section<br>Edman, Gunnar; Norrtälje sjukhus, Tiohundra AB<br>Deboussard, Catharina; Karolinska Institutet, Division of Rehabilitation Medicine Department of Clinical Sciences Danderyds University Hospital, Stockholm, Sweden<br>Bartfai, Aniko; Karolinska Institutet, Dep of Clinical Sciences, Danderyd Hospital |
| <b>Primary Subject Heading</b>: | Neurology                                                                                                                                                                                                                                                                                                                                                                                                                                                                   |
| Secondary Subject Heading:      | Rehabilitation medicine                                                                                                                                                                                                                                                                                                                                                                                                                                                     |
| Keywords:                       | brain concussions, coping-style, cognitive reserve                                                                                                                                                                                                                                                                                                                                                                                                                          |
|                                 |                                                                                                                                                                                                                                                                                                                                                                                                                                                                             |

SCHOLARONE™  
Manuscripts

only

1  
2  
3 **Emotional reserve and prolonged post-concussion symptoms and disability**

4  
5 **A prospective one-year mild traumatic brain injury cohort study**

6  
7  
8 Christian Oldenburg<sup>1</sup>, Anders Lundin<sup>2</sup>, Gunnar Edman<sup>3</sup>, Catharina Nygren  
9 deBoussard<sup>1</sup>, Aniko Bartfai<sup>1</sup>

10  
11  
12  
13  
14  
15 <sup>1</sup>Department of Clinical Sciences, Karolinska Institute and University Dept of  
16 Rehabilitation Medicine Stockholm, Danderyd Hospital, Stockholm, Sweden

17  
18 <sup>2</sup>Dizziness Center, Neuropsychiatry section, Stockholm, Sweden

19  
20  
21 <sup>3</sup>Norrtälje sjukhus, Tiohundra AB, Norrtälje, Sweden

22  
23  
24  
25  
26 Correspondence: Christian Oldenburg

27  
28 Department of Clinical Sciences

29  
30 Karolinska Institutet

31  
32 Dept of Rehabilitation Medicine Stockholm

33  
34 Danderyd Hospital

35  
36 18288, Stockholm, Sweden

37  
38 Tel: +46812355000

39  
40 e-mail: [christian.oldenburg@ki.se](mailto:christian.oldenburg@ki.se)

## Abstract

**Objective:** Prolonged post-concussion symptoms (PCS) affect a significant minority of mild traumatic brain injury (mTBI) patients. The aetiology is multi-factorial depending on pre-injury as well as peri- and post-injury factors. In this study, we examine outcome from an emotional reserve perspective.

**Design:** Prospective cohort study.

**Setting:** Patients were recruited from three emergency departments in major university hospitals in the same city. Follow-up data were collected in an outpatient setting at one of the recruiting hospitals.

**Participants:** 122 patients with a history of blunt head trauma (aged 15-65 years; male/female 57/37) admitted for mTBI within 24 hours after trauma, (Glasgow Coma Scale score of 14 – 15, loss of consciousness <30 minutes, and/or posttraumatic amnesia < 24 hours). Exclusion criteria were other significant physical injury, other major neurological disorder, including previous significant head injury.

**Procedure:** Recruitment in three emergency departments. Initial assessments were made one week after the injury. Patients were mailed the follow-up questionnaires one year post-injury.

**Outcome measures:** At one-week follow-up, the participants received a psychiatric assessment, completed a personality inventory, measures of psychological resilience, depression, anxiety, and post-traumatic symptoms. One-year outcome was measured by the Rivermead Post Concussion Symptoms and the Rivermead Head Injury Follow-Up questionnaires.

**Results:** The psychiatric examination revealed more symptoms of anxiety, depression and post-traumatic symptoms in the acute stage for patients who later developed PCS. After one year 12% matched the extended criteria for PCS ( $\geq 3$  symptoms and  $\geq 2$  disabilities). PCS patients reported more preinjury and concurrent psychiatric problems, lower level of functioning before the injury, and experienced more stress. They showed, higher somatic trait anxiety, embitterment, mistrust and lower level of psychological resilience, than, recovered participants.

**Conclusion:** PCS was associated with less adaptive emotional functioning already at the time of injury, which exacerbated after the mTBI.

## Keywords

concussion, cognitive reserve, coping-style, brain injury

## Strengths and limitations of this study

- Prospective design including relatively homogeneous consecutive patients (GCS 14-15), selected by injury criteria, not for post concussive complaints, within the first 24 hours after the trauma
- Individual standardized psychiatric assessment for the screening of current and preinjury psychiatric problems minimizing recall bias by early follow-up (< 1 week after injury)
- Assessment of preinjury factors performed without knowledge of late outcome
- Data collection includes a large number of preinjury as well as injury related variables, which in previous studies have been reported to be relevant for outcome
- Limited generalizability due to relatively high attrition rate (23 percent) where patients with shorter formal education were more likely to drop out.

## Introduction

The prognosis after a mild traumatic brain injury (mTBI) in general is beneficial<sup>1 2</sup>. However, a noteworthy proportion of individuals continue to report post-concussive symptoms (PCS) for months<sup>3 4</sup>, years,<sup>5</sup> or even decades<sup>6</sup>. The reason for the chronicity of the state is unclear. The hypothesis that PCS may be associated with acquired long-term cognitive deficits following mTBI has not been corroborated in meta-analyses<sup>7-11</sup>. Instead, some research points to the possibility that PCS is linked to lower *pre-injury* cognitive functioning, so called cognitive reserve<sup>12-15</sup>. In other words: the conditions in the brain at the time of injury may be more important than previously assumed for the outcome and suggest an individual pre-injury vulnerability for developing PCS.

Cognitive reserve is part of the larger construct *brain reserve capacity*, which was suggested by Paul Satz<sup>16</sup> as a threshold model for understanding different clinical outcomes after seemingly similar brain insults or pathologies. But, while brain reserve is typically concerned with anatomical features of the brain (e.g., brain volume, synaptic count, dendritic branching), cognitive reserve relates specifically to the active processes of the brain<sup>17</sup>. Individuals with higher cognitive reserve might be better to cope with brain injury by using pre-existing, more efficient, cognitive processing abilities, or by recruiting more unaffected networks in the brain in a compensatory manner<sup>18</sup>. Variables that have been used as estimates of cognitive reserve are those associated with life-time experiences<sup>18</sup>, such as educational and occupational attainment. These variables also relates heavily to socioeconomic status (SES), which has repeatedly been shown to influence health, regardless of whether the individual has suffered an injury or not<sup>19</sup>.

1  
2  
3 Gallo and Matthews<sup>20</sup> suggested a Reserve-Capacity Model where the relation  
4  
5 between low SES and health is explained. The model posits that people with lower  
6  
7 SES are at a disadvantage in two ways: first they are likely to experience more stress,  
8  
9 both daily hassles, and major stressors; secondly, they also have fewer reserves to  
10  
11 cope with that stress. Importantly, the authors suggest that the individual's intra-  
12  
13 personal reserves can act as a moderator and partly explain differences in health  
14  
15 outcome, and they present evidence that a negative emotional state is linked to  
16  
17 adverse health effects. In this perspective, we may think of an *intra-personal*  
18  
19 *emotional reserve* that, like the cognitive reserve, act as a buffer against adverse  
20  
21 subjective outcome and partly explain individual differences in outcome.  
22  
23

24 Emotional reserve is a hypothetical construct, and good proxies for  
25  
26 measurement might be measures of disadvantageous personality traits and  
27  
28 psychological resilience. Life circumstances that could be indicative of lower levels of  
29  
30 emotional reserve could also include previous exposure to psychiatric conditions.  
31  
32

33 Kay et al.<sup>21</sup> in an early descriptive clinical study of vulnerability for PCS  
34  
35 suggested personality traits such as overachievement, dependency, insecurity,  
36  
37 grandiosity, and borderline personality characteristics. Few studies have however  
38  
39 systematically investigated the association between personality and PCS. Rush and  
40  
41 co-workers<sup>22</sup> using consecutive patients from an emergency care unit found that  
42  
43 mTBI patients had scored in the normal range of a personality inventory (NEO-PI-R),  
44  
45 and were not significantly different from a control group. They did not find any  
46  
47 association between reported PCS symptoms and personality variables. However,  
48  
49 they did not examine a PCS group separately.  
50  
51

52 In a cross-sectional study of healthy participants with no prior brain injury  
53  
54 (n=93), Garden et al.<sup>23</sup> found that depressive, dependent, sadistic, negativistic,  
55  
56  
57  
58  
59

1  
2  
3 borderline, anxiety, somatic, dysthymia and major depression characteristics, as  
4 measured by the Millon Clinical Multiaxial Inventory–III were associated with a  
5  
6  
7 higher number of postconcussion-like symptoms. In a recent prospective cohort study,  
8  
9 Yuen et al.<sup>24</sup> found a positive association between depressive and anxious personality  
10  
11 traits and heightened PCS reporting after mTBI.  
12

13  
14 Psychological resilience has been described as an ability to recover from  
15  
16 different adverse experiences<sup>25</sup>. According to a recent review, there were only a few  
17  
18 studies, with conflicting results, concerning resilience as a moderating factor for  
19  
20 outcome after mTBI<sup>26</sup>. In general, there was an association between higher resilience  
21  
22 and less PCS. A Finnish prospective cohort study found that higher levels of  
23  
24 resilience were associated with lower symptom reporting<sup>25</sup>. Cross-sectional studies  
25  
26 have found that lower levels of resilience are associated with higher symptom-  
27  
28 reporting in participants who report having had a mTBI between 1-6 months ago<sup>27</sup>.  
29  
30 Similar results have been found in a military veterans sample<sup>28</sup>. However, in a  
31  
32 prospective cohort study of emergency department patients, McCauley and colleagues  
33  
34  
35  
36  
37  
38  
39  
40  
41  
42  
43  
44  
45  
46  
47  
48  
49  
50  
51  
52  
53  
54  
55  
56  
57  
58  
59  
60  
*higher* symptom reporting. In this study though, PCS-like symptoms were collected  
earlier (one month) post injury, before the onset of the more chronic stages of PCS<sup>30</sup>.

There are various results regarding the influence of previous psychiatric  
conditions as a predictor of PCS. Luis, Vanderploeg, and Curtiss<sup>13</sup> used a psychiatric  
interview in their sample of randomly selected Vietnam war veterans and found that a  
pre-combat history of psychiatric problems was more common for developing PCS. In  
a consecutive sample of emergency department visitors with mTBI, Meares et al.<sup>31 32</sup>  
found that a preinjury depressive or anxiety disorder had an increased risk for PCS.  
Ponsford et al.<sup>33</sup> also found that individuals with PCS, defined as highly distressed,



1  
2  
3 tended to have more previous neurological or psychiatric problems. Stulemeijer et al.  
4  
5 <sup>15</sup> studied a prospective sample of emergency department visitors with mTBI.  
6  
7 Premorbid emotional problems were not significantly associated with PCS although  
8  
9 close ( $p=.059$ ). In this sample, 32 percent reported a history of treatment with a  
10  
11 psychologist, social worker or psychiatrist, or current use of psychotropic medication,  
12  
13 or both, and supposedly broader inclusion criteria were applied. Snell et al. <sup>34</sup> reported  
14  
15 no association between preinjury psychiatric problems and worse outcome in a mixed  
16  
17 sample of prospectively followed emergency department mTBI patients as well as  
18  
19 referred patients to a concussion clinic.  
20  
21

22  
23 To conclude, there is a lack of research or conflicting results on the effect of  
24  
25 pre-injury emotional factors on outcome after mTBI. Vakil and his group <sup>35</sup> examined  
26  
27 several personality and emotional factors as components of reserve capacity in a  
28  
29 group of moderate to severe TBI patients. They found moderating effects of these  
30  
31 factors on outcome in addition to effects of injury severity.  
32

33  
34 We have previously reported <sup>12</sup> an association between cognitive reserve and  
35  
36 the development of post-concussion symptoms in a prospectively followed cohort of  
37  
38 mTBI patients. The aim of the present study was to investigate aspects of emotional  
39  
40 reserve, both psychological variables and psychiatric experiences and its association  
41  
42 with prolonged PCS, at one-year post-injury in the same study group.  
43  
44  
45  
46  
47  
48  
49  
50  
51  
52  
53  
54  
55  
56  
57  
58  
59  
60

## Method

### *Participants*

This study reports data from a larger mTBI-study where participants were recruited from three emergency departments during the period from January 2000 to December 2001. The study size was determined based on power calculations for differences on bio-medical variables for mTBI patients versus healthy controls. This have been reported previously<sup>36</sup>. This study reports a sub-set of the data concerning one-year outcome for mTBI-patients split into two outcome groups.

Inclusion required a history of blunt head trauma with admission to hospital emergency wards within 24 hours, with loss of consciousness (LOC) and/or posttraumatic amnesia (PTA), and a Glasgow Coma Scale (GCS) score of 14 – 15 at first assessment. Inclusion criteria were limited to GCS of 14–15 to create a more homogenous group since previous studies have suggested that patients with GCS 13 should be considered as a moderate severity<sup>37 38</sup>. Age range allowed for inclusion was 15 to 65. Exclusion criteria were any of the following: LOC > 30 minutes, PTA > 24 hours, other significant physical injury or other major neurological disorder, including a previous significant brain injury. Patients with high-velocity traumas were managed according to a regional trauma protocol and were not available for the study. No financial incentives were offered for participants, and no particular intervention was attached to the study. The study was approved by the regional ethical board.

PCS was defined as having three or more remaining symptoms on The Rivermead Post Concussion Symptoms Questionnaire (RPQ), and two or more disabilities on The Rivermead head injury follow up questionnaire (RHFUQ) at the

1  
2  
3 one-year follow-up. Patients who did not match the criteria for PCS was defined as  
4  
5 recovered.  
6

### 7 8 ***Procedure***

9  
10 Participants were recruited in the emergency department after having suffered an  
11  
12 mTBI. Eligible participants were approached by the physician on duty. Daily visits of  
13  
14 the research staff were aimed to decrease selections bias. After information about the  
15  
16 study, informed consent was obtained from all participating patients. The emergency  
17  
18 ward staff recorded GCS, duration of LOC, PTA and retrograde amnesia, and the  
19  
20 result of a blood alcohol test. CT scan of the brain was performed within 24 hours  
21  
22 after admission and an MRI scan of the brain was performed within one week. The  
23  
24 data collection was exhaustive and included questionnaires, cognitive testing,  
25  
26 psychiatric assessment and blood samples to test several hypotheses. However, data  
27  
28 collection was distributed during several days to minimize fatigue. This report focuses  
29  
30 on the following assessments: at day one, The RPQ was administered to measure  
31  
32 initial symptom severity. A multiaxial psychiatric assessment (see below) and  
33  
34 questionnaires were completed by the participants at one week post injury. Finally, at  
35  
36 one year post injury, the participants were mailed the RPQ and RHFUQ and were  
37  
38 instructed to complete and mail them back to the hospital. To maximize participation  
39  
40 at follow-up, participants were reminded through a telephone call by the research-  
41  
42 nurse  
43  
44  
45  
46

### 47 48 ***Measures***

#### 49 50 *Psychiatric assessment*

51  
52 Current and previous psychiatric diagnosis on Axis I and II according to DSM-IV  
53  
54 were established in the clinical interview, performed by an experienced  
55  
56  
57  
58  
59  
60

1  
2  
3 neuropsychiatrist (AL) taking also in consideration the risk for participators' bias and  
4 fatigue one week after the injury. General medical condition (Axis III) was assessed  
5 by a checklist survey, combined with a neurological examination to detect sequelae  
6 from the recent injury and to exclude other neurological disorders. Axis IV,  
7 psychosocial and environmental factors, was assessed by use of the *Severity of*  
8 *Psychosocial Stressors scale*. The scale addresses eleven potential areas of stress  
9 during the last year (e.g., financial problems, marital problems, loss of a relative), and  
10 comprises eleven "yes" or "no" questions. The experienced level of distress was rated  
11 on a graded scale with six options: none, mild, moderate, severe, extreme,  
12 catastrophic, as recommended in DSM-III-R<sup>39</sup>. Axis V, Global Assessment of  
13 Function (GAF), was assessed by use of a self-report version of the Global  
14 Assessment of Functioning Scale from 0 to 100. Two GAF measures were collected,  
15 one for the last year ("GAF-1") and one for the final two weeks ("GAF-2") before the  
16 injury.

#### 17 *Measures of post injury symptoms*

##### 18 *The Rivermead Post Concussion Symptoms Questionnaire (RPQ)*

19 This questionnaire, developed by King and co-workers consists of sixteen items to  
20 rate changes in subjective symptoms after a mild traumatic brain injury<sup>40</sup>. The scale  
21 uses five numerical categories, where 0 = not experienced at all, 1 = it is no longer a  
22 problem, 2 = a mild problem, 3 = a moderate problem, and 4 = a severe problem. The  
23 RPQ score is then calculated as the sum of all the symptom scores excluding ratings  
24 of 1 (as they indicate resolved symptoms).

##### 25 *The Rivermead head injury follow up questionnaire (RHFUQ)*

1  
2  
3 This self-report questionnaire contains ten items and covers a perceived change in  
4 ability in social and home activities. The scale uses five numerical categories, where 0  
5 = no change, 1 = no change, but more difficult, 2 = a mild change, 3 = a moderate  
6 change, 4 = a very marked change <sup>41</sup>.  
7  
8  
9  
10

#### 11 *The Hospital Anxiety and Depression Scale (HADS)*

12 HADS <sup>42</sup> was used to measure symptoms of anxiety and depression. It is a brief self-  
13 report test with 14 items (seven each for depression and anxiety). It was developed  
14 specifically to be used with non-psychiatric patients in medical and somatic settings.  
15  
16 The respondent marks the most suitable alternative for each item on a four point  
17 Likert scale and the responses are scored from 0 to 3. The HADS has been extensively  
18 used, and its psychometric properties have been found to be good <sup>43 44</sup>.  
19  
20  
21  
22  
23  
24  
25  
26  
27  
28  
29

#### 30 *The Impact of Event Scale – Revised (IES-R)*

31 IES-R is a widely used self-report scale for assessing stress reactions after traumatic  
32 events <sup>45</sup>. It contains 22 items where the respondent rates the frequency of stress  
33 reactions during the last week, with the following options: 0 (not at all), 1 (rarely), 3  
34 (sometimes) and 5 (often). The scale is composed of three subscales associated with  
35 posttraumatic stress disorder (PTSD): intrusion, avoidance, and hyper arousal. The  
36 IES-R has good psychometric properties <sup>46</sup>.  
37  
38  
39  
40  
41  
42  
43  
44

#### 45 *Preinjury behavioural and personality measures*

##### 46 *The Swedish Universities Scales of Personality (SSP)*

47  
48 SSP is a personality inventory standardized on a representative sample (n = 741)  
49 from the general Swedish population <sup>47</sup>. The SSP is designed to measure only traits  
50 commonly associated with psychopathology (e.g., anxiety proneness, extraversion,  
51  
52  
53  
54  
55  
56  
57  
58  
59  
60

1  
2  
3 and aggression-hostility). It consists of 91 items, divided into 13 subscales. Each item  
4 is expressed as a statement to which the respondent has four answers to choose from,  
5 ranging from "Does not apply at all" to "Applies completely." Scores are summed and  
6 transformed to T scores (mean = 50, SD = 10) for men and women separately.  
7  
8  
9

### 10 11 12 *The Sense of Coherence Scale (SOC)*

13  
14 The SOC measures psychological resilience to stressful events and was developed by  
15 Antonovsky<sup>48</sup>. The SOC scale contains three subcomponents: comprehensibility,  
16 manageability, and meaningfulness. The scale consists of twenty-nine statements, and  
17 the respondent marks his/her agreement on a seven point Likert scale. It has been used  
18 previously in traumatic brain injury research<sup>49</sup> who found that SOC-score was similar  
19 in a group of individuals with TBI many years post-injury when compared to  
20 nondisabled people. In patients with orthopaedic injuries, a high SOC score predicted  
21 a better outcome after surgery after one year<sup>50</sup>.  
22  
23  
24  
25  
26  
27  
28  
29  
30

### 31 32 33 *Alcohol Use Disorders Identification Test (AUDIT)*

34 Screening for hazardous alcohol use was made by use of the Alcohol Use Disorders  
35 Identification Test (AUDIT)<sup>51</sup>. The AUDIT consists of 10 items and measures  
36 alcohol consumption, drinking behaviour, adverse reactions and alcohol related  
37 problems during the last twelve months. Each item is scored from 0 to 4. A cut-off  
38 score of 8 or higher has been shown to have a sensitivity and specificity over 90 % for  
39 hazardous alcohol use<sup>51</sup>. It has been used in previous TBI-research<sup>52,53</sup>.  
40  
41  
42  
43  
44  
45  
46  
47

### 48 49 *Statistics*

50 All data were entered and analysed with IBM's SPSS. Categorical variables were  
51 summed into frequencies for each group and then analysed with  $\chi^2$ . For tables with  
52 small expected cell counts the Fisher exact test was used. For larger contingency  
53  
54  
55  
56  
57  
58  
59  
60

1  
2  
3 tables with ordered data (e.g., length of PTA), the linear-by-linear association test was  
4  
5 used.

6  
7 Numerical variables were first summarized with standard descriptives and  
8  
9 checked for skewness. Variables with skewness exceeding significantly above one  
10  
11 were subsequently analysed with a non-parametric method (Mann-Whitney).  
12  
13 Otherwise, the student's t-test was chosen for comparisons between the two outcome  
14  
15 groups. If the Levene's test for equality of variances was found to be violated, a t-  
16  
17 statistic not assuming homogeneity of variance was computed. Statistical significance  
18  
19 was set at  $p < .05$ , and all tests were two-tailed.  
20  
21  
22  
23

## 24 **Results**

### 25 ***Recruitment and one-year outcome***

26  
27  
28 A total of 122 patients accepted the invitation and were included in the study. The  
29  
30 initial recruitment process, including analysis of acceptance rate and differences  
31  
32 between participating and the non-participating patients, is described in previous  
33  
34 publications<sup>12 54</sup>.  
35  
36  
37

38  
39 At the one-year follow up, 94 participants were still in the program (attrition  
40  
41 rate 23 percent). The patients who dropped out ( $n=28$ ) did not differ from remaining  
42  
43 patients with respect to sex ( $\chi^2 (1) = 1.00, p = .316$ ), age ( $t (120) = 0.41, p = .967$ ) or  
44  
45 initial level of experienced symptoms as reported in RPQ ( $t (116) = 1.14, p = .257$ ).  
46  
47 However, the patients who dropped out had fewer years of education ( $M = 10.8, SD$   
48  
49  $3.6$ ) than remaining patients ( $M = 12.6, SD = 2.6$ ),  $t (110) = 2.46, p = .015$ .  
50

51  
52 Data on RPQ and RHFUQ at one-year post-injury was analyzed to create the  
53  
54 two outcome groups. In RPQ, fifty patients (53 %) reported having no remaining  
55  
56 symptoms at all, an additional twenty-six patients (28 %) reported just one or two  
57

1  
2  
3 remaining symptoms, and eighteen (19 %) reported three or more remaining  
4 symptoms. In RHFUQ seventy-eight patients (83%) reported no disability, an  
5 additional three patients (3 %) reported just one disability, and the remaining thirteen  
6 patients (14 %) reported two or more disabilities. Eleven patients (12 %) matched the  
7 combined criteria for PCS which required three or remaining symptoms and two or  
8 more remaining disabilities. Remaining patients (n=83) formed the recovered group.  
9  
10  
11  
12  
13  
14  
15

### 16 ***Sociodemographics***

17  
18 There was a significant association between sex and outcome,  $\chi^2 (1) = 5.81, p = .022$ .  
19 Based on the odds ratio, women were 4.97 times more likely to end up in the PCS  
20 group, 95 % CI [1.22 – 20.17]. There were no significant differences between the two  
21 groups with regard to age ( $t (92) = -1.08, p = .281$ ), years of education ( $t (92) = 1.24, p$   
22  $= .218$ ) or marital status ( $\chi^2 (1) = 0.53, p = 1.00$ ). The details are presented in Table 1,  
23 along with occupational status. Occupational status at the time of injury showed  
24 significant differences between the two groups ( $\chi^2 (5) = 33.24, p = <.001$ ) and was  
25 further analysed by visual inspection. A distinct difference between the two groups  
26 was that all students recovered by one year. Patients on sick leave at the time of the  
27 injury tended to develop PCS, while those on a pension (both retirement and  
28 disability) recovered.  
29  
30  
31  
32  
33  
34  
35  
36  
37  
38  
39  
40  
41  
42

### 43 ***Medical data***

44  
45 Data regarding acute injury characteristics for the two outcome groups at the one-year  
46 follow-up are presented in Table 2. The type of injury did not affect outcome ( $\chi^2 (4)$   
47  $= 6.91, p = .141$ ), nor did a lower GCS score ( $\chi^2 (1) = 0.82, p = 1.00$ ). Both loss of  
48 consciousness and PTA were divided into manageable time frames and cross-  
49 tabulated. No effect was found for loss of consciousness (linear-by-linear association  
50  $= 0.66, p = .417$ ), but longer duration of PTA was associated with recovery (linear-by-  
51  
52  
53  
54  
55  
56  
57  
58  
59  
60



1  
2  
3 linear association = 4.54,  $p = .033$ ). Eleven participants reported retrograde amnesia,  
4 four of them longer than five minutes. All of those who reported retrograde amnesia  
5 belonged to the recovered group, but it did not reach significance ( $\chi^2(1) = 1.65, p =$   
6  
7  
8  
9  
10  
11  
12  
13  
14  
15  
16  
17  
18  
19  
20  
21  
22  
23  
24  
25  
26  
27  
28  
29  
30  
31  
32  
33  
34  
35  
36  
37  
38  
39  
40  
41  
42  
43  
44  
45  
46  
47  
48  
49  
50  
51  
52  
53  
54  
55  
56  
57  
58  
59  
60  
linear association = 4.54,  $p = .033$ ). Eleven participants reported retrograde amnesia,  
four of them longer than five minutes. All of those who reported retrograde amnesia  
belonged to the recovered group, but it did not reach significance ( $\chi^2(1) = 1.65, p =$   
.351). No effect for alcohol intoxication  $\chi^2(1) = 1.47, p = .449$ . Further, alcohol  
intoxication at the time of injury was not associated with PTA ( $\chi^2(3) = 0.77, p = .857$ ),  
LOC ( $\chi^2(2) = 2.69, p = .261$ ), or retrograde amnesia ( $\chi^2(1) = 0.25, p = .696$ ). Injury  
related changes on CT or MRI was evident in eight participants and not related to  
outcome ( $\chi^2(1) = 1.50, p = .235$ ), but to a lower initial GCS ( $\chi^2(1) = 5.63, p = .049$ ).  
Initial symptom severity, as measured by the RPQ the day after the trauma, showed  
excessive skewness and was analysed with Mann-Whitney. The result showed that the  
PCS group (Mdn = 68.32) initially experienced significantly more symptoms than the  
recovered group (Mdn = 44.14),  $U = 685.50, p = .005, r = 0.29$ .

### ***Psychiatric assessment***

31  
32  
33  
34  
35  
36  
37  
38  
39  
40  
41  
42  
43  
44  
45  
46  
47  
48  
49  
50  
51  
52  
53  
54  
55  
56  
57  
58  
59  
60  
The psychiatric assessment found previous or concurrent psychiatric disorders in 29  
of the participants (31 percent). Nine out eleven PCS patients (83 percent) had a  
previous or concurrent psychiatric disorder, established at the psychiatric assessment  
one-week post injury. This was significantly higher than in the recovered group where  
only twenty out of 83 participants (24 percent) had a previous or concurrent disorder.  
Forty-two of the recovered patients and ten of the PCS patients reported psychosocial  
stress of at least moderate severity during the year before the injury, ( $\chi^2(1) = 6.38, p =$   
.020). Total number of psychosocial stressors showed excessive skewness and was  
analysed with Mann-Whitney. The result showed that the PCS group also reported  
more stressors (Mdn = 73.55) than the recovered group (Mdn = 44.05),  $U = 743.00, p =$   
.001,  $r = 0.36$ . The two self-rated GAF measures showed a negative skewness  
exceeding -1 and were consequently analysed with non-parametric analysis (Mann-

1  
2  
3 Whitney). Patients with PCS had significantly lower self-rated global functioning  
4  
5 ( $Mdn = 35.61$ ) than patients who had recovered ( $Mdn = 50.32$ ) for the year before the  
6  
7 injury,  $U = 470.0$ ,  $z = -2.11$ ,  $p = .035$ ,  $r = -0.22$ . For the two weeks before the injury  
8  
9 similar results were obtained with lower scores for patients with PCS ( $Mdn = 37.44$ )  
10  
11 than patients who had recovered ( $Mdn = 49.88$ ), but just short of being significant,  $U$   
12  
13  $= 503.0$ ,  $z = -1.77$ ,  $p = .076$ ,  $r = -0.18$ . The results for the actual ratings are shown in  
14  
15 Table 3.

### 16 17 18 ***Preinjury behavioral and personality measures***

19  
20 Participants who developed PCS reported significantly less resilience for stressful  
21  
22 events in the Sense of Coherence Scale than those participants who recovered ( $t(91)$   
23  
24  $= 2.44$ ,  $p = .018$ ,  $r = 0.25$ ). When breaking down the results in the three  
25  
26 subcomponents of the scale, no significant differences were found concerning  
27  
28 experienced comprehensibility or meaningfulness, but in manageability ( $t(91) = 2.79$ ,  
29  
30  $p = .006$ ,  $r = 0.28$ , see Table 3.

31  
32 To see if personality traits, as measured by the SSP, were associated with  
33  
34 outcome, independent samples t-tests were performed. Levene's test for equality of  
35  
36 variances was found to be violated for somatic trait anxiety ( $F(92) = 4.61$ ,  $p = .034$ ),  
37  
38 embitterment ( $F(92) = 10.98$ ,  $p = .001$ ), and physical trait aggressivity ( $F(92) = 4.34$ ,  
39  
40  $p = 0.40$ ). For these traits, a t-statistic not assuming homogeneity of variance was  
41  
42 computed. As can be seen in Table 4, results indicate that patients with PCS had  
43  
44 elevated somatic trait anxiety, embitterment, and mistrust when compared with the  
45  
46 group who had recovered. Previous alcohol consumption pattern did not differ  
47  
48 between the two groups, see Table 3.  
49  
50  
51  
52  
53  
54  
55  
56  
57  
58  
59  
60

### ***Post-injury symptoms***

Both Impact of Event Scale and Hospital Anxiety and Depression Scale showed excessive skewness ( $>1$ ) and was analysed using non-parametric methods (Mann-Whitney). The results showed that patients who developed PCS ( $Mdn = 68.45$ ) reported more initial post-traumatic stress than patients who later recovered ( $Mdn = 44.72$ ),  $U = 687.00$ ,  $z = 2.72$ ,  $p = .007$ ,  $r = 0.28$ . Looking further at the subscales revealed that the two groups differed significantly only in hyperarousal, with the PCS group ( $Mdn = 75.91$ ) reporting more distress than the recovered group ( $Mdn = 43.73$ ),  $U = 769.00$ ,  $z = 3.74$ ,  $p = .000$ ,  $r = 0.39$ . There were highly significant differences between the two groups on emotional distress as measured by HADS. One-week post injury, the PCS group ( $Mdn = 72.41$ ) experienced higher levels of anxiety than the recovered group ( $Mdn = 44.20$ ),  $U = 730.50$ ,  $z = 3.30$ ,  $p = .001$ ,  $r = 0.34$ . The PCS group ( $Mdn = 72.77$ ) also experienced more symptoms of depression than the recovered group ( $Mdn = 44.15$ ),  $U = 734.50$ ,  $z = 3.32$ ,  $p = .001$ ,  $r = 0.34$ . The parametric mean and standard deviation for both scales are shown in table 5.

### **Discussion**

The main purpose of this study was to examine if aspects of emotional reserve capacity were associated with the development of PCS symptoms after mTBI, to complete our previous findings regarding cognitive reserve in the same cohort<sup>12</sup>. At the one-year follow-up, twelve percent of this cohort fulfilled our extended criteria for PCS, including both symptoms and disability.

Factors related to the actual injury, so called peri-injury factors, were in general not related to outcome. On the other hand, the weight of preinjury factors emerged markedly. The PCS-group reported a greater number of psychosocial

1  
2  
3 stressors for the year preceding the injury, corroborating previous findings<sup>55</sup>. We  
4  
5 found that individuals with a previous or concurrent psychiatric disorder, or with a  
6  
7 family history of such disorder were more likely to develop PCS. Both GAF ratings  
8  
9 were significantly lower, corroborating and extending earlier findings<sup>13 32 33</sup>. Despite  
10  
11 the elevated frequency of 15 percent of alcohol abuse in the cohort, there were no  
12  
13 differences in the number of intoxicated patients or alcohol abuse between PCS- and  
14  
15 recovered patients. Among the post-injury factors, higher levels of PTSD symptoms  
16  
17 as assessed by the IES-R, in particular the subscale of hyper-arousal showed a clear  
18  
19 association to PCS. Also, both anxiety and depression was higher in PCS patients one  
20  
21 week after trauma. The findings are further supported by the design of the study, since  
22  
23 data was obtained within a week after the mTBI, minimizing recall bias and before  
24  
25 the development of PCS symptoms, minimizing the risk for confirmation bias.  
26  
27

28  
29 We used the Swedish Scales of Personality, the SSP, to measure different  
30  
31 aspects of personality and found in the PCS group elevated level of somatic anxiety,  
32  
33 but not psychic anxiety, compared to the recovered group. The SSP divides trait  
34  
35 anxiety into a psychic and a somatic component<sup>47 56</sup>. This division of anxiety was  
36  
37 first suggested by Eysenck<sup>57</sup> where the somatic component reflects autonomous over-  
38  
39 reactivity, and the mental component reflects brooding and worrying behaviour.  
40  
41 Further, the PCS group had significantly higher levels of mistrust. This SSP-scale has  
42  
43 its origins in the subscale suspicion in the Buss-Durkee Hostility Inventory<sup>58</sup> and  
44  
45 measures traits of being suspicious and distrusting of other people's motives. The  
46  
47 elevated level of embitterment in the PCS group may be linked to coping responses  
48  
49 during stressful life events. The SSP scale can be illustrated by the following item: "I  
50  
51 had often gotten into trouble even when it was not my fault.". Blaming others has  
52  
53 previously been found to influence symptom reporting in mTBI patients<sup>59</sup>. To sum it  
54  
55  
56  
57  
58  
59  
60

1  
2  
3 up, a pattern of higher reactivity in the autonomic nervous system, and some  
4  
5 personality traits (embitterment and suspiciousness) may lead to more stress in  
6  
7 everyday life, and an increased sensitivity when encountering and managing traumatic  
8  
9 events, such as a brain injury.

10  
11 We used a different measure of psychological resilience in connection with  
12  
13 mTBI than other studies<sup>26</sup>, but the findings were similar; lower levels were linked to  
14  
15 PCS development. The three-factor construction of the SOC allows further analysis of  
16  
17 different aspects of resilience: comprehensibility, manageability, and meaningfulness.  
18  
19 We found that it was only manageability was significantly lower in the PCS group.  
20  
21 This subscale is tapping into an underlying construct of being in control of one's life  
22  
23 and a sense of mastery. To our knowledge, this finding has not been reported before.  
24  
25 Thus, the outcome differed despite seemingly similar brain insult, highlighting the  
26  
27 importance of biopsychosocial factors for the development of PCS<sup>60</sup>, such as the  
28  
29 extent of cognitive<sup>17</sup> and emotional reserve<sup>35</sup>.

30  
31  
32  
33 As mentioned before, the peri-injury factors were hardly related to outcome in  
34  
35 this study. Injury related changes found on MRI or CT scan and initial lower GCS-  
36  
37 score were not related to PCS, which is in line with previous findings<sup>61 62</sup>. However,  
38  
39 PCS-patients reported a shorter duration of PTA. One should mention though that  
40  
41 there were few individuals with imaging findings and the GCS score was restricted to  
42  
43 just 14 or 15, so one cannot rule out that the study was under powered to detect  
44  
45 differences.

46  
47  
48 To conclude, the present findings fit and extend Gallo and Matthews<sup>20</sup>  
49  
50 Reserve-Capacity Model demonstrating a link between psychosocial adjustment and  
51  
52 specific symptom development after an injury. The results demonstrate the meaning  
53  
54 of intra-personal emotional reserve for symptom development along with cognitive  
55  
56  
57  
58  
59  
60

1  
2  
3 reserve, complementing our previous findings. Thus, the variations seen in outcome  
4 after mTBI may to a considerable degree reflect individual differences in emotional  
5 and cognitive coping ability. The results highlight the importance of considering  
6 psychiatric history when identifying patients at risk of developing PCS and emphasize  
7 the value of considering these pre-injury factors in clinical management.  
8  
9  
10  
11  
12  
13  
14  
15  
16  
17  
18  
19  
20  
21  
22  
23  
24  
25  
26  
27  
28  
29  
30  
31  
32  
33  
34  
35  
36  
37  
38  
39  
40  
41  
42  
43  
44  
45  
46  
47  
48  
49  
50  
51  
52  
53  
54  
55  
56  
57  
58  
59  
60

For peer review only

## Author Statement

CO, AL and AB conceived of the present study. AL, GE, CNB and AB initiated the study design. AL and CNB contributed to data collection. GE provided statistical expertise. All authors contributed to the interpretation of the study results as well as the writing of the manuscript. All authors have read and agree with the manuscript's final content.

## Competing interests

The authors report no competing interest.

## Funding

This study was supported by grants from:

- The Swedish insurance company AFA
- Hjärnskadeförbundet Hjärnkraft, a Swedish organization for people with acquired brain injury
- The Promobilia Foundation

Svenska Läkaresällskapet (The Swedish Medical Association)

## Data sharing statement

There are no unpublished data available.

## Acknowledgments

The authors wish to thank professor emeritus Jörgen Borg, the primary investigator of the original study, Seija Lundh, reg nurse and Daniel Karlsted and Siw Evans, lic

1  
2  
3 psychologists for their contribution during recruitment and data collection, and all  
4  
5 participants who devoted time and engagement to make this study possible.  
6  
7  
8  
9  
10  
11  
12  
13  
14  
15  
16  
17  
18  
19  
20  
21  
22  
23  
24  
25  
26  
27  
28  
29  
30  
31  
32  
33  
34  
35  
36  
37  
38  
39  
40  
41  
42  
43  
44  
45  
46  
47  
48  
49  
50  
51  
52  
53  
54  
55  
56  
57  
58  
59  
60

For peer review only



## References

1. Carroll LJ, Cassidy JD, Peloso PM, et al. Prognosis for mild traumatic brain injury: results of the WHO Collaborating Centre Task Force on Mild Traumatic Brain Injury. *J Rehabil Med* 2004(43 Suppl):84-105. [published Online First: 2004/04/16]
2. Cassidy JD, Cancelliere C, Carroll LJ, et al. Systematic review of self-reported prognosis in adults after mild traumatic brain injury: results of the International Collaboration on Mild Traumatic Brain Injury Prognosis. *Archives of physical medicine and rehabilitation* 2014;95(3 Suppl):S132-51. doi: 10.1016/j.apmr.2013.08.299 [published Online First: 2014/03/04]
3. Lannsjö M, af Geijerstam JL, Johansson U, et al. Prevalence and structure of symptoms at 3 months after mild traumatic brain injury in a national cohort. *Brain Inj* 2009;23(3):213-9. doi: 10.1080/02699050902748356 [published Online First: 2009/02/12]
4. Dischinger PC, Ryb GE, Kufera JA, et al. Early predictors of postconcussive syndrome in a population of trauma patients with mild traumatic brain injury. *J Trauma* 2009;66(2):289-96; discussion 96-7. doi: 10.1097/TA.0b013e3181961da2 [published Online First: 2009/02/11]
5. Elgmark Andersson E, Emanuelson I, Bjorklund R, et al. Mild traumatic brain injuries: the impact of early intervention on late sequelae. A randomized controlled trial. *Acta Neurochir (Wien)* 2007;149(2):151-9; discussion 60. doi: 10.1007/s00701-006-1082-0 [published Online First: 2007/01/26]
6. Andersson EE, Bedics BK, Falkmer T. Mild traumatic brain injuries: a 10-year follow-up. *J Rehabil Med* 2011;43(4):323-9. doi: 10.2340/16501977-0666 [published Online First: 2011/01/29]
7. Belanger HG, Curtiss G, Demery JA, et al. Factors moderating neuropsychological outcomes following mild traumatic brain injury: a meta-analysis. *J Int Neuropsychol Soc* 2005;11(3):215-27. doi: 10.1017/S1355617705050277 [published Online First: 2005/05/17]
8. Binder LM. A review of mild head trauma. Part II: Clinical implications. *Journal of clinical and experimental neuropsychology* 1997;19(3):432-57. doi: 10.1080/01688639708403871 [published Online First: 1997/06/01]
9. Frencham KA, Fox AM, Maybery MT. Neuropsychological studies of mild traumatic brain injury: a meta-analytic review of research since 1995. *Journal of clinical and experimental neuropsychology* 2005;27(3):334-51. doi: 10.1080/13803390490520328 [published Online First: 2005/06/23]
10. Schretlen DJ, Shapiro AM. A quantitative review of the effects of traumatic brain injury on cognitive functioning. *Int Rev Psychiatry* 2003;15(4):341-9. doi: 10.1080/09540260310001606728 [published Online First: 2004/07/28]
11. Godbolt AK, Cancelliere C, Hincapie CA, et al. Systematic review of the risk of dementia and chronic cognitive impairment after mild traumatic brain injury: results of the International Collaboration on Mild Traumatic Brain Injury Prognosis. *Archives of physical medicine and rehabilitation* 2014;95(3 Suppl):S245-56. doi: 10.1016/j.apmr.2013.06.036 [published Online First: 2014/03/04]
12. Oldenburg C, Lundin A, Edman G, et al. Cognitive reserve and persistent post-concussion symptoms--A prospective mild traumatic brain injury (mTBI) cohort study. *Brain Inj* 2016;30(2):146-55. doi: 10.3109/02699052.2015.1089598 [published Online First: 2015/12/01]

13. Luis CA, Vanderploeg RD, Curtiss G. Predictors of postconcussion symptom complex in community dwelling male veterans. *J Int Neuropsychol Soc* 2003;9(7):1001-15. doi: 10.1017/S1355617703970044 [published Online First: 2004/01/24]
14. Fay TB, Yeates KO, Taylor HG, et al. Cognitive reserve as a moderator of postconcussive symptoms in children with complicated and uncomplicated mild traumatic brain injury. *J Int Neuropsychol Soc* 2010;16(1):94-105. doi: 10.1017/S1355617709991007 [published Online First: 2009/10/20]
15. Stulemeijer M, van der Werf S, Borm GF, et al. Early prediction of favourable recovery 6 months after mild traumatic brain injury. *J Neurol Neurosurg Psychiatry* 2008;79(8):936-42. doi: 10.1136/jnnp.2007.131250 [published Online First: 2007/10/24]
16. Satz P. Brain reserve capacity on symptom onset after brain injury: A formulation and review of evidence for threshold theory. *Neuropsychology* 1993;7(3):273-95. doi: 10.1037/0894-4105.7.3.273
17. Bigler ED, Stern Y. Traumatic brain injury and reserve. *Handb Clin Neurol* 2015;128:691-710. doi: 10.1016/B978-0-444-63521-1.00043-1 [published Online First: 2015/02/24]
18. Stern Y. Cognitive reserve. *Neuropsychologia* 2009;47(10):2015-28. doi: 10.1016/j.neuropsychologia.2009.03.004 [published Online First: 2009/05/27]
19. Feinstein JS. The relationship between socioeconomic status and health: a review of the literature. *Milbank Q* 1993;71(2):279-322. [published Online First: 1993/01/01]
20. Gallo LC, Matthews KA. Understanding the association between socioeconomic status and physical health: do negative emotions play a role? *Psychol Bull* 2003;129(1):10-51. [published Online First: 2003/01/31]
21. Kay T, Newman B, Cavallo M, et al. Toward a Neuropsychological model of functional disability after mild traumatic brain injury. *Neuropsychology* 1992;6(4):371-84.
22. Rush BK, Malec JF, Moessner AM, et al. Preinjury Personality Traits and the Prediction of Early Neurobehavioral Symptoms Following Mild Traumatic Brain Injury. *Rehabilitation Psychology* 2004;49(4):275-81. doi: 10.1037/0090-5550.49.4.275
23. Garden N, Sullivan KA, Lange RT. The relationship between personality characteristics and postconcussion symptoms in a nonclinical sample. *Neuropsychology* 2010;24(2):168-75. doi: 10.1037/a0017431 [published Online First: 2010/03/17]
24. Yuen KM, Tsai YH, Lin WC, et al. Retrospectively evaluated preinjury personality traits influence postconcussion symptoms. *Applied neuropsychology Adult* 2016;23(5):322-32. doi: 10.1080/23279095.2015.1057638 [published Online First: 2016/01/21]
25. Losoi H, Silverberg ND, Waljas M, et al. Resilience Is Associated with Outcome from Mild Traumatic Brain Injury. *Journal of neurotrauma* 2015;32(13):942-9. doi: 10.1089/neu.2014.3799 [published Online First: 2015/03/13]
26. Sullivan KA, Kempe CB, Edmed SL, et al. Resilience and Other Possible Outcomes After Mild Traumatic Brain Injury: a Systematic Review. *Neuropsychol Rev* 2016;26(2):173-85. doi: 10.1007/s11065-016-9317-1 [published Online First: 2016/05/08]
27. Sullivan KA, Edmed SL, Allan AC, et al. The role of psychological resilience and mTBI as predictors of postconcussional syndrome symptomatology. *Rehabil*

- 1  
2  
3 *Psychol* 2015;60(2):147-54. doi: 10.1037/rep0000037 [published Online First:  
4 2015/03/31]
- 5 28. Merritt VC, Lange RT, French LM. Resilience and symptom reporting following  
6 mild traumatic brain injury in military service members. *Brain Inj*  
7 2015;29(11):1325-36. doi: 10.3109/02699052.2015.1043948 [published  
8 Online First: 2015/07/24]
- 9 29. McCauley SR, Wilde EA, Miller ER, et al. Preinjury resilience and mood as  
10 predictors of early outcome following mild traumatic brain injury. *Journal of*  
11 *neurotrauma* 2013;30(8):642-52. doi: 10.1089/neu.2012.2393 [published  
12 Online First: 2012/10/11]
- 13 30. King NS. Post-concussion syndrome: clarity amid the controversy? *Br J*  
14 *Psychiatry* 2003;183(4):276-8. doi: 10.1192/bjp.183.4.276 [published Online  
15 First: 2003/10/02]
- 16 31. Meares S, Shores EA, Taylor AJ, et al. Mild traumatic brain injury does not  
17 predict acute postconcussion syndrome. *J Neurol Neurosurg Psychiatry*  
18 2008;79(3):300-6. doi: 10.1136/jnnp.2007.126565 [published Online First:  
19 2007/08/19]
- 20 32. Meares S, Shores EA, Taylor AJ, et al. The prospective course of postconcussion  
21 syndrome: the role of mild traumatic brain injury. *Neuropsychology*  
22 2011;25(4):454-65. doi: 10.1037/a0022580 [published Online First:  
23 2011/05/18]
- 24 33. Ponsford J, Willmott C, Rothwell A, et al. Factors influencing outcome following  
25 mild traumatic brain injury in adults. *J Int Neuropsychol Soc* 2000;6(5):568-  
26 79. doi: 10.1017/S1355617700655066 [published Online First: 2000/08/10]
- 27 34. Snell DL, Siegert RJ, Hay-Smith EJ, et al. Associations between illness  
28 perceptions, coping styles and outcome after mild traumatic brain injury:  
29 preliminary results from a cohort study. *Brain Inj* 2011;25(11):1126-38. doi:  
30 10.3109/02699052.2011.607786 [published Online First: 2011/08/30]
- 31 35. Sela-Kaufman M, Rassovsky Y, Agranov E, et al. Premorbid personality  
32 characteristics and attachment style moderate the effect of injury severity on  
33 occupational outcome in traumatic brain injury: another aspect of reserve.  
34 *Journal of clinical and experimental neuropsychology* 2013;35(6):584-95. doi:  
35 10.1080/13803395.2013.799123 [published Online First: 2013/05/25]
- 36 36. Nygren De Boussard C, Fredman P, Lundin A, et al. S100 in mild traumatic brain  
37 injury. *Brain Inj* 2004;18(7):671-83. doi: 10.1080/02699050310001646215  
38 [published Online First: 2004/06/19]
- 39 37. Gomez PA, Lobato RD, Ortega JM, et al. Mild head injury: differences in  
40 prognosis among patients with a Glasgow Coma Scale score of 13 to 15 and  
41 analysis of factors associated with abnormal CT findings. *Br J Neurosurg*  
42 1996;10(5):453-60. [published Online First: 1996/10/01]
- 43 38. Uchino Y, Okimura Y, Tanaka M, et al. Computed tomography and magnetic  
44 resonance imaging of mild head injury--is it appropriate to classify patients  
45 with Glasgow Coma Scale score of 13 to 15 as "mild injury"? *Acta Neurochir*  
46 *(Wien)* 2001;143(10):1031-7. [published Online First: 2001/10/31]
- 47 39. American Psychiatric Association. Diagnostic and statistical manual of mental  
48 disorders: DSM-III-R. 3 rev ed. Cambridge 1987.
- 49 40. King NS, Crawford S, Wenden FJ, et al. The Rivermead Post Concussion  
50 Symptoms Questionnaire: a measure of symptoms commonly experienced  
51 after head injury and its reliability. *J Neurol* 1995;242(9):587-92. [published  
52 Online First: 1995/09/01]
- 53  
54  
55  
56  
57  
58  
59  
60

- 1
  - 2
  - 3
  - 4
  - 5
  - 6
  - 7
  - 8
  - 9
  - 10
  - 11
  - 12
  - 13
  - 14
  - 15
  - 16
  - 17
  - 18
  - 19
  - 20
  - 21
  - 22
  - 23
  - 24
  - 25
  - 26
  - 27
  - 28
  - 29
  - 30
  - 31
  - 32
  - 33
  - 34
  - 35
  - 36
  - 37
  - 38
  - 39
  - 40
  - 41
  - 42
  - 43
  - 44
  - 45
  - 46
  - 47
  - 48
  - 49
  - 50
  - 51
  - 52
  - 53
  - 54
  - 55
  - 56
  - 57
  - 58
  - 59
  - 60
41. Crawford S, Wenden FJ, Wade DT. The Rivermead head injury follow up questionnaire: a study of a new rating scale and other measures to evaluate outcome after head injury. *J Neurol Neurosurg Psychiatry* 1996;60(5):510-4. [published Online First: 1996/05/01]
42. Zigmond AS, Snaith RP. The hospital anxiety and depression scale. *Acta Psychiatr Scand* 1983;67(6):361-70. [published Online First: 1983/06/01]
43. Herrmann C. International experiences with the Hospital Anxiety and Depression Scale--a review of validation data and clinical results. *J Psychosom Res* 1997;42(1):17-41. [published Online First: 1997/01/01]
44. Bjelland I, Dahl AA, Haug TT, et al. The validity of the Hospital Anxiety and Depression Scale. An updated literature review. *J Psychosom Res* 2002;52(2):69-77. [published Online First: 2002/02/08]
45. Weiss DS, Marmar CR. The Impact of Event Scale - Revised. In: Wilson JP, Keane TM, eds. *Assessing psychological trauma and PTSD: A Practitioner's Handbook*. New York: Guilford Press 1997:399-411.
46. Sundin EC, Horowitz MJ. Impact of Event Scale: psychometric properties. *Br J Psychiatry* 2002;180:205-9. [published Online First: 2002/03/02]
47. Gustavsson JP, Bergman H, Edman G, et al. Swedish universities Scales of Personality (SSP): construction, internal consistency and normative data. *Acta Psychiatr Scand* 2000;102(3):217-25. [published Online First: 2000/09/29]
48. Antonovsky A. The structure and properties of the sense of coherence scale. *Soc Sci Med* 1993;36(6):725-33. [published Online First: 1993/03/01]
49. Jacobsson LJ, Westerberg M, Malec JF, et al. Sense of coherence and disability and the relationship with life satisfaction 6-15 years after traumatic brain injury in northern Sweden. *Neuropsychol Rehabil* 2011;21(3):383-400. doi: 10.1080/09602011.2011.566711 [published Online First: 2011/04/12]
50. Ristner G, Andersson R, Johansson LM, et al. Sense of coherence and lack of control in relation to outcome after orthopaedic injuries. *Injury* 2000;31(10):751-6. [published Online First: 2001/01/13]
51. Saunders JB, Aasland OG, Babor TF, et al. Development of the Alcohol Use Disorders Identification Test (AUDIT): WHO Collaborative Project on Early Detection of Persons with Harmful Alcohol Consumption--II. *Addiction* 1993;88(6):791-804. [published Online First: 1993/06/01]
52. Ponsford J, Whelan-Goodinson R, Bahar-Fuchs A. Alcohol and drug use following traumatic brain injury: a prospective study. *Brain Inj* 2007;21(13-14):1385-92. doi: 10.1080/02699050701796960 [published Online First: 2007/12/11]
53. Ponsford J, Tweedly L, Taffe J. The relationship between alcohol and cognitive functioning following traumatic brain injury. *Journal of clinical and experimental neuropsychology* 2013;35(1):103-12. doi: 10.1080/13803395.2012.752437 [published Online First: 2013/01/24]
54. Lundin A, de Boussard C, Edman G, et al. Symptoms and disability until 3 months after mild TBI. *Brain Inj* 2006;20(8):799-806. doi: 10.1080/02699050600744327 [published Online First: 2006/10/25]
55. van Veldhoven LM, Sander AM, Struchen MA, et al. Predictive ability of preinjury stressful life events and post-traumatic stress symptoms for outcomes following mild traumatic brain injury: analysis in a prospective emergency room sample. *J Neurol Neurosurg Psychiatry* 2011;82(7):782-7. doi: 10.1136/jnnp.2010.228254 [published Online First: 2011/01/19]

- 1  
2  
3 56. Schalling D, Asberg M, Edman G, et al. Markers for vulnerability to  
4 psychopathology: temperament traits associated with platelet MAO activity.  
5 *Acta Psychiatr Scand* 1987;76(2):172-82. [published Online First: 1987/08/01]  
6  
7 57. Eysenck HJ. Handbook of abnormal psychology, an experimental approach. 1st  
8 ed. New York,: Basic Books 1961.  
9  
10 58. Buss AH, Durkee A. An inventory for assessing different kinds of hostility. *J*  
11 *Consult Psychol* 1957;21(4):343-9. [published Online First: 1957/08/01]  
12  
13 59. Rutherford WH. Sequelae of concussion caused by minor head injuries. *Lancet*  
14 1977;1(8001):1-4. [published Online First: 1977/01/01]  
15  
16 60. Iverson GL, Silverberg N, Lange RT, et al. Conceptualizing Outcome from Mild  
17 Traumatic Brain Injury. In: Zasler ND, Katz DI, Zafonte RD, eds. *Brain Injury*  
18 *Medicine - Principles and Practice*. 2 ed. New York: Demos Medical  
19 Publishing 2013.  
20  
21 61. Lannsjo M, Backheden M, Johansson U, et al. Does head CT scan pathology  
22 predict outcome after mild traumatic brain injury? *Eur J Neurol*  
23 2013;20(1):124-9. doi: 10.1111/j.1468-1331.2012.03813.x [published Online  
24 First: 2012/07/21]  
25  
26 62. Iverson GL, Lange RT, Waljas M, et al. Outcome from Complicated versus  
27 Uncomplicated Mild Traumatic Brain Injury. *Rehabil Res Pract*  
28 2012;2012:415740. doi: 10.1155/2012/415740 [published Online First:  
29 2012/05/12]  
30  
31  
32  
33  
34  
35  
36  
37  
38  
39  
40  
41  
42  
43  
44  
45  
46  
47  
48  
49  
50  
51  
52  
53  
54  
55  
56  
57  
58  
59  
60

Table 1: Sociodemographic characteristics of mTBI patients split into recovered by one year and those who reported both symptoms and disability (PCS).

| Characteristic                | Recovered<br>( <i>n</i> = 83) | PCS<br>( <i>n</i> = 11) |
|-------------------------------|-------------------------------|-------------------------|
| Age, Mean (SD)                | 36.7 (15.2)                   | 41.9 (13.2)             |
| Sex, n (%)                    |                               |                         |
| Male                          | 54 (65)                       | 3 (27)                  |
| Female                        | 29 (35)                       | 8 (73)                  |
| Marital status, n (%)         |                               |                         |
| Unmarried, living alone       | 20 (24)                       | 3 (27)                  |
| Married, living together      | 63 (76)                       | 8 (73)                  |
| Years of education, Mean (SD) | 12.7 (2.6)                    | 11.6 (2.7)              |
| Occupational status, n (%)    |                               |                         |
| Working                       | 63 (76)                       | 6 (55)                  |
| Studying                      | 15 (18)                       | 0 (0)                   |
| Unemployed                    | 0 (0)                         | 1 (9)                   |
| Sick leave                    | 1 (1)                         | 4 (36)                  |
| Disability pension            | 2 (2)                         | 0 (0)                   |
| Retirement pension            | 2 (2)                         | 0 (0)                   |

Table 2: Peri-injury data for the those who had recovered by one year, and those who still reported post concussive symptoms (PCS).

| Characteristics                      | Recovered<br>(n=83) | PCS<br>(n=11) |
|--------------------------------------|---------------------|---------------|
| Type of injury, n (%)                |                     |               |
| Fall from height                     | 31 (37)             | 3 (27)        |
| Fall from the same level             | 17 (20)             | 1 (9)         |
| Traffic                              | 17 (20)             | 3 (27)        |
| Assaults                             | 9 (11)              | 0 (0)         |
| Other                                | 9 (11)              | 4 (36)        |
| Loss of Consciousness, n (%)         |                     |               |
| < 1 minute                           | 37 (45)             | 5 (45)        |
| 1-5 minutes                          | 31 (37)             | 6 (55)        |
| 6-30 minutes                         | 15 (18)             | 0 (0)         |
| Post-traumatic amnesia, n (%)        |                     |               |
| < 1 minute                           | 10 (12)             | 4 (36)        |
| 1-5 minutes                          | 19 (23)             | 4 (36)        |
| 6-45 minutes                         | 34 (41)             | 1 (9)         |
| > 45 minutes                         | 20 (24)             | 2 (18)        |
| GCS Score, n (%)                     |                     |               |
| 15                                   | 73 (88)             | 10 (91)       |
| 14                                   | 10 (12)             | 1 (9)         |
| Retrograde amnesia                   | 11 (13)             | 0 (0)         |
| Injury related changes on CT or MRI  | 6 (7)               | 2 (18)        |
| Intoxicated by alcohol, n (%)        | 22 (27)             | 1 (9)         |
| Initial symptom severity*, Mean (SD) | 10.4 (9.3)          | 23.8 (17.0)   |

Note: Initial symptom severity was measured by the Rivermead Post Concussion Symptoms Questionnaire (RPQ). There was one missing protocol from the recovered group. The variable showed excessive skewness and Mann-Whitney was used as statistical method. However, here the values are shown since they are considered more informative.

Table 3: Pre-injury variables for mTBI patients split into those who had recovered by one year and those who reported both symptoms and disability (PCS)

| Variables                                    | Recovered<br>(n=83) | PCS<br>(n=11) | p    |
|----------------------------------------------|---------------------|---------------|------|
| Previous or concurrent psych disorder, n (%) | 20 (24)             | 9 (82)        | .000 |
| Previous psych disorder                      | 16 (19)             | 7 (64)        | .004 |
| Concurrent psych. disorder                   | 8 (10)              | 7 (64)        | .000 |
| Family history of psych disorder             | 17 (20)             | 4 (36)        | .257 |
| Self-assessed GAF, Mean (SD)                 |                     |               |      |
| The year before the injury                   | 86.2 (11.5)         | 67.3 (21.5)   | .015 |
| The two weeks before the injury              | 87.1 (11.1)         | 73.2 (20.3)   | .048 |
| Previous mild traumatic brain injury         | 4 (5)               | 2 (18)        | .147 |
| Alcohol consumption (Audit)                  |                     |               |      |
| Mean (SD)                                    | 4.99 (4.22)         | 5.50 (8.07)   | .751 |
| Eight or above, n (%)                        | 13 (17)             | 1 (10)        | 1.00 |
| Sense of Coherence Scale, Mean (SD)          |                     |               |      |
| Coherence                                    | 54,0 (8,2)          | 51,0 (6,6)    | .240 |
| Manageability                                | 57,1 (8,0)          | 49,5 (11,6)   | .006 |
| Meaningfulness                               | 46,8 (6,0)          | 41,5 (10,7)   | .135 |
| Total                                        | 53,1 (11,3)         | 44,1 (14,4)   | .018 |
| Number of psychosocial stressors, Mean (SD)  | 1.30 (1.40)         | 3.73 (2.15)   | .004 |

Note: There were eight missing questionnaires for Audit (seven for the recovered and one for the PCS group). There was one missing questionnaire for Sense of Coherence Scale.



Table 4: Mean T-scores for the Swedish universities scales of personality completed one week post injury, split into those who had recovered by one year and those who reported both symptoms and disability (PCS).

| Personality variable        | Recovered<br>(n=83) |      | PCS<br>(n=11) |      | p    | Cohen's<br>d |
|-----------------------------|---------------------|------|---------------|------|------|--------------|
|                             | M                   | SD   | M             | SD   |      |              |
| Anxiety proneness           |                     |      |               |      |      |              |
| Somatic trait anxiety       | 45,3                | 7,8  | 53,8          | 11,0 | .030 | 0.89         |
| Psychic trait anxiety       | 45,4                | 9,1  | 49,8          | 11,6 | .156 | 0.42         |
| Stress susceptibility       | 46,9                | 10,4 | 52,1          | 15,1 | .145 | 0.40         |
| Low assertiveness           | 46,8                | 9,7  | 43,9          | 10,5 | .362 | -0.04        |
| Extraversion                |                     |      |               |      |      |              |
| Impulsivity                 | 51,8                | 9,4  | 54,5          | 12,6 | .400 | 0.23         |
| Adventure seeking           | 54,1                | 9,3  | 55,9          | 7,7  | .558 | 0.21         |
| Detachment                  | 44,2                | 8,7  | 47,7          | 8,9  | .216 | 0.40         |
| Embitterment                | 46,7                | 8,4  | 59,3          | 15,3 | .022 | 1.02         |
| Social desirability         | 54,4                | 9,7  | 51,3          | 9,6  | .311 | -0.32        |
| Aggression-Hostility        |                     |      |               |      |      |              |
| Verbal trait aggressivity   | 50,4                | 8,4  | 51,0          | 11,1 | .823 | 0.06         |
| Physical trait aggressivity | 47,2                | 9,0  | 53,6          | 14,6 | .185 | 0.53         |
| Trait irritability          | 46,2                | 10,9 | 52,0          | 14,6 | .112 | 0.45         |
| Mistrust                    | 44,5                | 10,7 | 55,1          | 13,2 | .004 | 0.88         |

Table 5: The results from measures of post-traumatic and emotional symptoms at one week post injury for the two outcome groups: recovered and those who still reported symptoms and disability (PCS) at one year post injury.

| Variable                              | Recovered<br>(n=83) |           | PCS<br>(n=11) |           | p    |
|---------------------------------------|---------------------|-----------|---------------|-----------|------|
|                                       | <i>M</i>            | <i>SD</i> | <i>M</i>      | <i>SD</i> |      |
| Impact of Event Scale                 |                     |           |               |           |      |
| Intrusions                            | 6,2                 | 5,4       | 15,2          | 14,7      | .132 |
| Avoidance                             | 4,8                 | 6,7       | 9,3           | 10,2      | .223 |
| Hyper-arousal                         | 3,5                 | 4,3       | 12,4          | 8,7       | .000 |
| Total                                 | 14.5                | 14.5      | 36,8          | 30,0      | .007 |
| Hospital Anxiety and Depression Scale |                     |           |               |           |      |
| Anxiety                               | 2.7                 | 3.3       | 8.4           | 5.7       | .001 |
| Depression                            | 2.2                 | 2.6       | 6.7           | 4.7       | .001 |

Note: Both scales showed excessive skewness (>1) and was analyzed with non-parametric method (Mann-Whitney). The actual parametric scores are shown here for being more informative.

## STROBE Statement—checklist of items that should be included in reports of observational studies

|                              | <b>Item No</b> | <b>Recommendation</b>                                                                                                                                                                                                                                                                                                                                                                                                                                                                                      |
|------------------------------|----------------|------------------------------------------------------------------------------------------------------------------------------------------------------------------------------------------------------------------------------------------------------------------------------------------------------------------------------------------------------------------------------------------------------------------------------------------------------------------------------------------------------------|
| <b>Title and abstract</b>    | 1              | (a) Indicate the study's design with a commonly used term in the title or the abstract<br><b>Page 1</b><br>(b) Provide in the abstract an informative and balanced summary of what was done and what was found<br><b>Page 2</b>                                                                                                                                                                                                                                                                            |
| <b>Introduction</b>          |                |                                                                                                                                                                                                                                                                                                                                                                                                                                                                                                            |
| Background/rationale         | 2              | Explain the scientific background and rationale for the investigation being reported<br><b>Pages 4-7</b>                                                                                                                                                                                                                                                                                                                                                                                                   |
| Objectives                   | 3              | State specific objectives, including any prespecified hypotheses<br><b>Page 7</b>                                                                                                                                                                                                                                                                                                                                                                                                                          |
| <b>Methods</b>               |                |                                                                                                                                                                                                                                                                                                                                                                                                                                                                                                            |
| Study design                 | 4              | Present key elements of study design early in the paper<br><b>Page 8</b>                                                                                                                                                                                                                                                                                                                                                                                                                                   |
| Setting                      | 5              | Describe the setting, locations, and relevant dates, including periods of recruitment, exposure, follow-up, and data collection<br><b>Page 8-9</b>                                                                                                                                                                                                                                                                                                                                                         |
| Participants                 | 6              | (a) <i>Cohort study</i> —Give the eligibility criteria, and the sources and methods of selection of participants. Describe methods of follow-up<br><b>Page 8-9</b>                                                                                                                                                                                                                                                                                                                                         |
| Variables                    | 7              | Clearly define all outcomes, exposures, predictors, potential confounders, and effect modifiers. Give diagnostic criteria, if applicable<br><b>Page 8</b>                                                                                                                                                                                                                                                                                                                                                  |
| Data sources/<br>measurement | 8*             | For each variable of interest, give sources of data and details of methods of assessment (measurement). Describe comparability of assessment methods if there is more than one group<br><b>Pages 9-12</b>                                                                                                                                                                                                                                                                                                  |
| Bias                         | 9              | Describe any efforts to address potential sources of bias<br><b>Participant bias:</b><br><b>Recall bias – page 3</b><br><b>Confirmation bias, social desirability and fatigue page 9</b><br><br><b>Selection bias –</b><br><b>participation, representativity page 9</b><br><b>analysis of differences between participating and nonparticipating patients and between participants and drop – outs – page 13</b><br><b>Researcher bias: Early data collection minimizes bias – study design – page 18</b> |
| Study size                   | 10             | Explain how the study size was arrived at<br><b>Page 8</b>                                                                                                                                                                                                                                                                                                                                                                                                                                                 |
| Quantitative variables       | 11             | Explain how quantitative variables were handled in the analyses. If applicable, describe which groupings were chosen and why<br><b>Page 12</b>                                                                                                                                                                                                                                                                                                                                                             |
| Statistical methods          | 12             | (a) Describe all statistical methods, including those used to control for confounding                                                                                                                                                                                                                                                                                                                                                                                                                      |

1  
2 **Page 12**

---

3 (b) Describe any methods used to examine subgroups and interactions

4 N/A

---

5 (c) Explain how missing data were addressed

6 **We used an unbiased approach, and stated where there were missing data in**  
7 **the tables, see table 2 and 3.**

---

8 (d) *Cohort study*—If applicable, explain how loss to follow-up was addressed

9 **Page 13**

---

10 (e) Describe any sensitivity analyses

11 N/A  
12  
13  
14  
15  
16  
17  
18  
19  
20  
21  
22  
23  
24  
25  
26  
27  
28  
29  
30  
31  
32  
33  
34  
35  
36  
37  
38  
39  
40  
41  
42  
43  
44  
45  
46  
47  
48  
49  
50  
51  
52  
53  
54  
55  
56  
57  
58  
59  
60

1  
2  
3  
4  
5  
6  
7  
8  
9  
10  
11  
12  
13  
14  
15  
16  
17  
18  
19  
20  
21  
22  
23  
24  
25  
26  
27  
28  
29  
30  
31  
32  
33  
34  
35  
36  
37  
38  
39  
40  
41  
42  
43  
44  
45  
46  
47  
48  
49  
50  
51  
52  
53  
54  
55  
56  
57  
58  
59  
60**Results**

|              |     |                                                                                                                                                                                                                     |
|--------------|-----|---------------------------------------------------------------------------------------------------------------------------------------------------------------------------------------------------------------------|
| Participants | 13* | (a) Report numbers of individuals at each stage of study—eg numbers potentially eligible, examined for eligibility, confirmed eligible, included in the study, completing follow-up, and analysed<br><b>Page 13</b> |
|              |     | (b) Give reasons for non-participation at each stage<br><b>Page 13</b>                                                                                                                                              |
|              |     | (c) Consider use of a flow diagram<br>N/A                                                                                                                                                                           |

|                  |     |                                                                                                                                                                      |
|------------------|-----|----------------------------------------------------------------------------------------------------------------------------------------------------------------------|
| Descriptive data | 14* | (a) Give characteristics of study participants (eg demographic, clinical, social) and information on exposures and potential confounders<br><b>Page 14, Table 1.</b> |
|                  |     | (b) Indicate number of participants with missing data for each variable of interest<br><b>See Table 2 and 3.</b>                                                     |
|                  |     | (c) <i>Cohort study</i> —Summarise follow-up time (eg, average and total amount)<br><b>Page 9</b>                                                                    |

|              |     |                                                                                                       |
|--------------|-----|-------------------------------------------------------------------------------------------------------|
| Outcome data | 15* | <i>Cohort study</i> —Report numbers of outcome events or summary measures over time<br><b>Page 15</b> |
|--------------|-----|-------------------------------------------------------------------------------------------------------|

|              |    |                                                                                                                                                                                                                                                                    |
|--------------|----|--------------------------------------------------------------------------------------------------------------------------------------------------------------------------------------------------------------------------------------------------------------------|
| Main results | 16 | (a) Give unadjusted estimates and, if applicable, confounder-adjusted estimates and their precision (eg, 95% confidence interval). Make clear which confounders were adjusted for and why they were included<br><b>We have only included unadjusted estimates.</b> |
|              |    | (b) Report category boundaries when continuous variables were categorized<br><b>Pages 12-13</b>                                                                                                                                                                    |
|              |    | (c) If relevant, consider translating estimates of relative risk into absolute risk for a meaningful time period<br>N/A                                                                                                                                            |

|                |    |                                                                                                       |
|----------------|----|-------------------------------------------------------------------------------------------------------|
| Other analyses | 17 | Report other analyses done—eg analyses of subgroups and interactions, and sensitivity analyses<br>N/A |
|----------------|----|-------------------------------------------------------------------------------------------------------|

**Discussion**

|             |    |                                                                                |
|-------------|----|--------------------------------------------------------------------------------|
| Key results | 18 | Summarise key results with reference to study objectives<br><b>Pages 17-18</b> |
|-------------|----|--------------------------------------------------------------------------------|

|             |    |                                                                                                                                                                              |
|-------------|----|------------------------------------------------------------------------------------------------------------------------------------------------------------------------------|
| Limitations | 19 | Discuss limitations of the study, taking into account sources of potential bias or imprecision. Discuss both direction and magnitude of any potential bias<br><b>Page 19</b> |
|-------------|----|------------------------------------------------------------------------------------------------------------------------------------------------------------------------------|

|                |    |                                                                                                                                                                                                  |
|----------------|----|--------------------------------------------------------------------------------------------------------------------------------------------------------------------------------------------------|
| Interpretation | 20 | Give a cautious overall interpretation of results considering objectives, limitations, multiplicity of analyses, results from similar studies, and other relevant evidence<br><b>Pages 17-19</b> |
|----------------|----|--------------------------------------------------------------------------------------------------------------------------------------------------------------------------------------------------|

|                  |    |                                                                                         |
|------------------|----|-----------------------------------------------------------------------------------------|
| Generalisability | 21 | Discuss the generalisability (external validity) of the study results<br><b>Page 19</b> |
|------------------|----|-----------------------------------------------------------------------------------------|

**Other information**

|         |    |                                                                                                                                                                                 |
|---------|----|---------------------------------------------------------------------------------------------------------------------------------------------------------------------------------|
| Funding | 22 | Give the source of funding and the role of the funders for the present study and, if applicable, for the original study on which the present article is based<br><b>Page 20</b> |
|---------|----|---------------------------------------------------------------------------------------------------------------------------------------------------------------------------------|

1  
2 \*Give information separately for cases and controls in case-control studies and, if applicable, for exposed and  
3 unexposed groups in cohort and cross-sectional studies.  
4

5 **Note:** An Explanation and Elaboration article discusses each checklist item and gives methodological background and  
6 published examples of transparent reporting. The STROBE checklist is best used in conjunction with this article (freely  
7 available on the Web sites of PLoS Medicine at <http://www.plosmedicine.org/>, Annals of Internal Medicine at  
8 <http://www.annals.org/>, and Epidemiology at <http://www.epidem.com/>). Information on the STROBE Initiative is  
9 available at [www.strobe-statement.org](http://www.strobe-statement.org).  
10  
11  
12  
13  
14  
15  
16  
17  
18  
19  
20  
21  
22  
23  
24  
25  
26  
27  
28  
29  
30  
31  
32  
33  
34  
35  
36  
37  
38  
39  
40  
41  
42  
43  
44  
45  
46  
47  
48  
49  
50  
51  
52  
53  
54  
55  
56  
57  
58  
59  
60

# BMJ Open

## Emotional reserve and prolonged post-concussion symptoms and disability: A Swedish prospective one-year mild traumatic brain injury cohort study

|                                 |                                                                                                                                                                                                                                                                                                                                                                                                                                                                             |
|---------------------------------|-----------------------------------------------------------------------------------------------------------------------------------------------------------------------------------------------------------------------------------------------------------------------------------------------------------------------------------------------------------------------------------------------------------------------------------------------------------------------------|
| Journal:                        | <i>BMJ Open</i>                                                                                                                                                                                                                                                                                                                                                                                                                                                             |
| Manuscript ID                   | bmjopen-2017-020884.R1                                                                                                                                                                                                                                                                                                                                                                                                                                                      |
| Article Type:                   | Research                                                                                                                                                                                                                                                                                                                                                                                                                                                                    |
| Date Submitted by the Author:   | 12-Mar-2018                                                                                                                                                                                                                                                                                                                                                                                                                                                                 |
| Complete List of Authors:       | Oldenburg, Christian; Karolinska Institutet, Department of Clinical Sciences, Danderyd Hospital;<br>Lundin, Anders; Dizziness Center, Neuropsychiatry section<br>Edman, Gunnar; Norrtälje sjukhus, Tiohundra AB<br>Deboussard, Catharina; Karolinska Institutet, Division of Rehabilitation Medicine Department of Clinical Sciences Danderyds University Hospital, Stockholm, Sweden<br>Bartfai, Aniko; Karolinska Institutet, Dep of Clinical Sciences, Danderyd Hospital |
| <b>Primary Subject Heading</b>: | Neurology                                                                                                                                                                                                                                                                                                                                                                                                                                                                   |
| Secondary Subject Heading:      | Rehabilitation medicine                                                                                                                                                                                                                                                                                                                                                                                                                                                     |
| Keywords:                       | brain concussions, coping-style, cognitive reserve, emotional reserve, post-concussion syndrome                                                                                                                                                                                                                                                                                                                                                                             |
|                                 |                                                                                                                                                                                                                                                                                                                                                                                                                                                                             |

SCHOLARONE™  
Manuscripts

1  
2  
3 **Emotional reserve and prolonged post-concussion symptoms and disability**  
4  
5 **A Swedish prospective one-year mild traumatic brain injury cohort study**  
6  
7

8 Christian Oldenburg<sup>1</sup>, Anders Lundin<sup>2</sup>, Gunnar Edman<sup>3</sup>, Catharina Nygren  
9 deBoussard<sup>1</sup>, Aniko Bartfai<sup>1</sup>  
10  
11

12  
13  
14  
15 <sup>1</sup>Department of Clinical Sciences, Karolinska Institute and University Dept of  
16 Rehabilitation Medicine Stockholm, Danderyd Hospital, Stockholm, Sweden  
17

18 <sup>2</sup>Dizziness Center, Neuropsychiatry section, Stockholm, Sweden  
19

20  
21 <sup>3</sup>Norrtälje sjukhus, Tiohundra AB, Norrtälje, Sweden  
22  
23

24  
25  
26 Correspondence: Christian Oldenburg  
27

28 Department of Clinical Sciences  
29

30 Karolinska Institutet  
31

32 Dept of Rehabilitation Medicine Stockholm  
33

34 Danderyd Hospital  
35

36 18288, Stockholm, Sweden  
37

38 Tel: +46812355000  
39

40 e-mail: [christian.oldenburg@ki.se](mailto:christian.oldenburg@ki.se)  
41  
42  
43  
44  
45  
46  
47  
48  
49  
50  
51  
52  
53  
54  
55  
56  
57  
58  
59  
60



## Abstract

**Objective:** Prolonged post-concussion symptoms (PCS) affect a significant minority of mild traumatic brain injury (mTBI) patients. The aetiology is multi-factorial depending on pre-injury as well as peri- and post-injury factors. In this study, we examine outcome from an emotional reserve perspective.

**Design:** Prospective cohort study.

**Setting:** Patients were recruited from three emergency departments in major university hospitals in Stockholm, Sweden. Follow-up data were collected in an outpatient setting at one of the recruiting hospitals.

**Participants:** 122 patients with a history of blunt head trauma (aged 15-65 years; admitted for mTBI within 24 hours after trauma, (Glasgow Coma Scale score of 14 – 15, loss of consciousness <30 minutes, and/or posttraumatic amnesia < 24 hours). Exclusion criteria were other significant physical injury, other major neurological disorder, including previous significant head injury.

**Procedure:** Recruitment in three emergency departments. Initial assessments were made within one week after the injury. Patients were mailed the follow-up questionnaires one year post-injury.

**Outcome measures:** A psychiatric assessment was performed at one week post-injury. The participants also completed a personality inventory, measures of psychological resilience, depression, anxiety, and post-traumatic symptoms. One-year outcome was measured by the Rivermead Post Concussion Symptoms and the Rivermead Head Injury Follow-Up questionnaires.

**Results:** The psychiatric assessment revealed more symptoms of anxiety, depression and post-traumatic symptoms in the acute stage for patients who later developed PCS. After one year, 94 participants were still in the program (male/female 57/37) and 12% matched the extended criteria for PCS ( $\geq 3$  symptoms and  $\geq 2$  disabilities). PCS patients reported more preinjury and concurrent psychiatric problems, lower level of functioning before the injury, and experienced more stress. They showed higher somatic trait anxiety, embitterment, mistrust and lower level of psychological resilience, than, recovered participants.

**Conclusion:** Intra-personal emotional reserve shape the emergence and persistence of PCS after mTBI.

## Keywords

concussion, cognitive reserve, coping-style, brain injury, emotional reserve

## Strengths and limitations of this study

- Prospective design including relatively homogeneous consecutive patients (GCS 14-15), selected by injury criteria, not for post concussive complaints, within the first 24 hours after the trauma
- Individual standardized psychiatric assessment for the screening of current and preinjury psychiatric problems minimizing recall bias by early follow-up (< 1 week after injury)
- Assessment of preinjury factors was performed without knowledge of late outcome
- The number of patients with prolonged post-concussion symptoms and disability (PCS) were few (n=11), implying reduced power to detect differences when compared to recovered patients.
- Limited generalizability due to relatively high attrition rate (23 percent) where patients with shorter formal education were more likely to drop out.

## Introduction

The prognosis after a mild traumatic brain injury (mTBI) in general is beneficial<sup>1 2</sup>. However, a noteworthy proportion of individuals continue to report post-concussive symptoms (PCS) for months<sup>3 4</sup>, years,<sup>5</sup> or even decades<sup>6</sup>. The reason for the chronicity of the state is unclear. The hypothesis that PCS may be associated with acquired long-term cognitive deficits following mTBI has not been corroborated in meta-analyses<sup>7-11</sup>. Instead, some research points to the possibility that PCS is linked to lower *pre-injury* cognitive functioning, so called cognitive reserve<sup>12-15</sup>. In other words: the conditions in the brain at the time of injury may be more important than previously assumed for the outcome and suggest an individual pre-injury vulnerability for developing PCS.

Cognitive reserve is part of the larger construct *brain reserve capacity*, which was suggested by Paul Satz<sup>16</sup> as a threshold model for understanding different clinical outcomes after seemingly similar brain insults or pathologies. But, while brain reserve is typically concerned with anatomical features of the brain (e.g., brain volume, synaptic count, dendritic branching), cognitive reserve relates specifically to the active processes of the brain<sup>17</sup>. Individuals with higher cognitive reserve might be better to cope with brain injury by using pre-existing, more efficient, cognitive processing abilities, or by recruiting more unaffected networks in the brain in a compensatory manner<sup>18</sup>. Variables that have been used as estimates of cognitive reserve are those associated with life-time experiences<sup>18</sup>, such as educational and occupational attainment. These variables also relates heavily to socioeconomic status (SES), which has repeatedly been shown to influence health, regardless of whether the individual has suffered an injury or not<sup>19</sup>.

1  
2  
3 Gallo and Matthews<sup>20</sup> suggested a Reserve-Capacity Model where the relation  
4  
5 between low SES and health is explained. The model posits that people with lower  
6  
7 SES are at a disadvantage in two ways: firstly they are likely to experience more  
8  
9 stress, both daily hassles, and major stressors; secondly, they also have fewer reserves  
10  
11 to cope with that stress. Importantly, the authors suggest that the individual's intra-  
12  
13 personal reserves can act as a moderator and partly explain differences in health  
14  
15 outcome, and they present evidence that a negative emotional state is linked to  
16  
17 adverse health effects. In this perspective, we may think of an *intra-personal*  
18  
19 *emotional reserve* that, like the cognitive reserve, act as a buffer against adverse  
20  
21 subjective outcome and partly explain individual differences in outcome.  
22  
23

24 Emotional reserve is a hypothetical construct, and good proxies for  
25  
26 measurement might be measures of disadvantageous personality traits and  
27  
28 psychological resilience. Life circumstances that could be indicative of lower levels of  
29  
30 emotional reserve could also include previous mental health problems.  
31  
32

33 Kay et al.<sup>21</sup> in an early descriptive clinical study of vulnerability for PCS  
34  
35 suggested personality traits such as overachievement, dependency, insecurity,  
36  
37 grandiosity, and borderline personality characteristics. Few studies have however  
38  
39 systematically investigated the association between personality and PCS. Rush and  
40  
41 co-workers<sup>22</sup> using consecutive patients from an emergency care unit found that  
42  
43 mTBI patients had scored in the normal range of a personality inventory (NEO-PI-R),  
44  
45 and were not significantly different from a control group. They did not find any  
46  
47 association between reported PCS symptoms and personality variables. However,  
48  
49 they did not examine a PCS group separately.  
50  
51

52 In a cross-sectional study of healthy participants with no prior brain injury  
53  
54 (n=93), Garden et al.<sup>23</sup> found that depressive, dependent, sadistic, negativistic,  
55  
56  
57  
58  
59

1  
2  
3 borderline, anxiety, somatic, dysthymia and major depression characteristics, as  
4 measured by the Millon Clinical Multiaxial Inventory–III were associated with a  
5 higher number of postconcussion-like symptoms. In a recent prospective cohort study,  
6  
7 Yuen et al.<sup>24</sup> found a positive association between depressive and anxious personality  
8  
9 traits and heightened PCS reporting after mTBI.  
10  
11  
12

13  
14 Psychological resilience has been described as an ability to recover from  
15 different adverse experiences<sup>25</sup>. According to a recent review, there were only a few  
16 studies, with conflicting results, concerning resilience as a moderating factor for  
17 outcome after mTBI<sup>26</sup>. In general, there was an association between higher resilience  
18 and less PCS. A Finnish prospective cohort study found that higher levels of  
19 resilience were associated with lower symptom reporting<sup>25</sup>. Cross-sectional studies  
20 have found that lower levels of resilience are associated with higher symptom-  
21 reporting in participants who report having had a mTBI between 1-6 months ago<sup>27</sup>.  
22 Similar results have been found in a military veterans sample<sup>28</sup>. However, in a  
23 prospective cohort study of emergency department patients, McCauley and colleagues  
24  
25  
26  
27  
28  
29  
30  
31  
32  
33  
34  
35  
36  
37  
38  
39  
40  
41  
42  
43  
44  
45  
46  
47  
48  
49  
50  
51  
52  
53  
54  
55  
56  
57  
58  
59  
60  
29 found that higher levels of resilience at baseline (<24 hours) was associated with  
*higher* symptom reporting. In this study though, PCS-like symptoms were collected  
earlier (one month) post injury, before the onset of the more chronic stages of PCS<sup>30</sup>.

There are various results regarding the influence of previous psychiatric  
conditions as a predictor of PCS. Luis, Vanderploeg, and Curtiss<sup>13</sup> used a psychiatric  
interview in their sample of randomly selected Vietnam war veterans and found that a  
pre-combat history of psychiatric problems was more common for developing PCS. In  
a consecutive sample of emergency department visitors with mTBI, Meares et al.<sup>31 32</sup>  
found that a preinjury depressive or anxiety disorder had an increased risk for PCS.  
Ponsford et al.<sup>33</sup> also found that individuals with PCS, defined as highly distressed,

1  
2  
3 tended to have more previous neurological or psychiatric problems. Stulemeijer et al.  
4  
5 <sup>15</sup> studied a prospective sample of emergency department visitors with mTBI.  
6  
7 Premorbid emotional problems were not significantly associated with PCS although  
8  
9 close ( $p=.059$ ). In this sample, 32 percent reported a history of treatment with a  
10  
11 psychologist, social worker or psychiatrist, or current use of psychotropic medication,  
12  
13 or both, and supposedly broader inclusion criteria were applied. Snell et al. <sup>34</sup> reported  
14  
15 no association between preinjury psychiatric problems and worse outcome in a mixed  
16  
17 sample of prospectively followed emergency department mTBI patients as well as  
18  
19 referred patients to a concussion clinic.  
20  
21

22  
23 One reason for conflicting results in studies of PCS, is different inclusion  
24  
25 criteria, creating diverse prevalence rates in different studies. Some of the more usual  
26  
27 symptoms (e.g headache, fatigue and memory problems) after mTBI are also common  
28  
29 in other diagnostic groups, and even in people who reports to be healthy. It is thus  
30  
31 possible that criteria based only on symptom reporting is too lenient. We suggest that  
32  
33 one way to sharpen PCS criteria is to require, in addition to symptoms, reporting of  
34  
35 disability, in line with the DSM-IV provisional diagnosis of post-concussive disorder  
36  
37 requiring disability in at least two different areas in life <sup>35</sup>.  
38  
39

40  
41 To conclude, there is a lack of research or conflicting results on the effect of  
42  
43 pre-injury emotional factors on outcome after mTBI. Vakil and his group <sup>36</sup> examined  
44  
45 several personality and emotional factors as components of reserve capacity in a  
46  
47 group of moderate to severe TBI patients. They found moderating effects of these  
48  
49 factors on outcome in addition to effects of injury severity.

50  
51 We have previously reported <sup>12</sup> an association between cognitive reserve and  
52  
53 the development of post-concussion symptoms in a prospectively followed cohort of  
54  
55 mTBI patients. The aim of the present study was to investigate aspects of emotional  
56  
57  
58  
59  
60

1  
2  
3 reserve, psychological variables and psychiatric vulnerability and their association  
4 with a restrictively defined PCS group, at one-year post-injury in the same study  
5  
6  
7 group.  
8  
9

## 10 11 **Method**

### 12 13 14 *Participants*

15  
16 This study reports data from a larger mTBI-study where participants were recruited  
17 from three emergency departments during the period from January 2000 to December  
18 2001. The study size was determined based on power calculations for differences on  
19 bio-medical variables for mTBI patients versus healthy controls. This have been  
20 reported previously<sup>37</sup>. This study reports a sub-set of the data concerning one-year  
21 outcome for mTBI-patients split into two outcome groups.  
22  
23  
24  
25  
26  
27  
28

29  
30 Inclusion criteria required visit to emergency ward within 24 hours after blunt  
31 head trauma, with loss of consciousness (LOC) and/or posttraumatic amnesia (PTA),  
32 and a Glasgow Coma Scale (GCS) score of 14 – 15 at first assessment. Inclusion  
33 criteria were limited to GCS of 14–15 to create a more homogenous group since  
34 previous studies have suggested that patients with GCS 13 should be considered as a  
35 moderate severity<sup>38 39</sup>. Age range allowed for inclusion was 15 to 65. Exclusion  
36 criteria were any of the following: LOC > 30 minutes, PTA > 24 hours, other  
37 significant physical injury or other major neurological disorder, including a previous  
38 significant brain injury. Patients with high-velocity traumas were managed according  
39 to a regional trauma protocol and were not available for the study. No financial  
40 incentives were offered for participants, and no particular intervention was attached to  
41 the study. The study was approved by the regional ethical board.  
42  
43  
44  
45  
46  
47  
48  
49  
50  
51  
52  
53  
54  
55  
56  
57  
58  
59  
60

1  
2  
3 PCS was defined as having three or more remaining symptoms on The  
4 Rivermead Post Concussion Symptoms Questionnaire (RPQ), and two or more  
5 disabilities on The Rivermead head injury follow up questionnaire (RHFUQ) at the  
6 one-year follow-up. Patients who did not match the criteria for PCS was defined as  
7 recovered.  
8  
9  
10  
11  
12

### 13 14 ***Procedure***

15  
16 Participants were recruited in the emergency department when they sought care for  
17 having suffered a blunt head trauma. Eligible participants were approached by the  
18 physician on duty. Daily visits of the research staff were aimed to decrease selection  
19 bias. After information about the study, informed consent was obtained from all  
20 participating patients. The emergency ward staff recorded GCS, duration of LOC,  
21 PTA and retrograde amnesia, and the result of a blood alcohol test. CT scan of the  
22 brain was performed within 24 hours after admission and an MRI scan of the brain  
23 was performed within one week. Scans were evaluated according to standard hospital  
24 routines by experienced radiologists. The data collection was exhaustive and included  
25 questionnaires, cognitive testing, psychiatric assessment and blood samples to test  
26 several hypotheses. However, data collection was distributed during several days to  
27 minimize fatigue. This report focuses on the following assessments: at day one, The  
28 RPQ was administered to measure initial symptom severity. A multi-axial psychiatric  
29 assessment (see below) and questionnaires were completed by the participants within  
30 one week post injury. Finally, at one year post injury, the participants were mailed the  
31 RPQ and RHFUQ and were instructed to complete and mail them back to the hospital.  
32  
33  
34  
35  
36  
37  
38  
39  
40  
41  
42  
43  
44  
45  
46  
47  
48  
49  
50  
51  
52  
53  
54  
55  
56  
57  
58  
59  
60



## Measures

### *Psychiatric assessment*

Current and previous psychiatric diagnosis on Axis I and II according to DSM-IV were established in a semi-structured clinical interview, performed by an experienced neuropsychiatrist (AL) taking also in consideration the risk for participators' bias and fatigue one week after the injury. General medical condition (Axis III) was assessed by a checklist survey, combined with a neurological examination to detect sequelae from the recent injury and to exclude other neurological disorders. Axis IV, psychosocial and environmental factors, was assessed by use of the *Severity of Psychosocial Stressors scale*, completed by the participant. The scale addresses eleven potential areas of stress during the last year (e.g., financial problems, marital problems, loss of a relative), and comprises eleven "yes" or "no" questions. The experienced level of distress was rated on a graded scale with six options: none, mild, moderate, severe, extreme, catastrophic, as recommended in DSM-III-R<sup>40</sup>. Axis V, Global Assessment of Function (GAF), was assessed by use of a self-report version of the Global Assessment of Functioning Scale from 0 to 100. Two GAF measures were collected, one for the last year ("GAF-1") and one for the two weeks ("GAF-2") preceding the injury.

### *Measures of post injury symptoms*

#### *The Rivermead Post Concussion Symptoms Questionnaire (RPQ)*

This questionnaire, developed by King and co-workers consists of sixteen items to rate changes in subjective symptoms after a mild traumatic brain injury<sup>41</sup>. The scale uses five numerical categories, where 0 = not experienced at all, 1 = it is no longer a problem, 2 = a mild problem, 3 = a moderate problem, and 4 = a severe problem. The

1  
2  
3 RPQ score is then calculated as the sum of all the symptom scores excluding ratings  
4 of 1 (as they indicate resolved symptoms).  
5  
6

7  
8 *The Rivermead head injury follow up questionnaire (RHFUQ)*  
9

10 This self-report questionnaire contains ten items and covers a perceived change in  
11 ability in social and home activities. The scale uses five numerical categories, where 0  
12 = no change, 1 = no change, but more difficult, 2 = a mild change, 3 = a moderate  
13 change, 4 = a very marked change <sup>42</sup>.  
14  
15  
16  
17

18  
19 *The Hospital Anxiety and Depression Scale (HADS)*  
20

21 HADS <sup>43</sup> was used to measure symptoms of anxiety and depression. It is a brief self-  
22 report test with 14 items (seven each for depression and anxiety). It was developed  
23 specifically to be used with non-psychiatric patients in medical and somatic settings.  
24  
25  
26  
27  
28 The respondent marks the most suitable alternative for each item on a four point  
29 Likert scale and the responses are scored from 0 to 3. The HADS has been extensively  
30 used, and its psychometric properties have been found to be good <sup>44 45</sup>.  
31  
32  
33

34  
35 *The Impact of Event Scale – Revised (IES-R)*  
36

37 IES-R is a widely used self-report scale for assessing stress reactions after traumatic  
38 events <sup>46</sup>. It contains 22 items where the respondent rates the frequency of stress  
39 reactions during the last week, with the following options: 0 (not at all), 1 (rarely), 3  
40 (sometimes) and 5 (often). The scale is composed of three subscales associated with  
41 posttraumatic stress disorder (PTSD): intrusion, avoidance, and hyperarousal. The  
42  
43  
44  
45  
46  
47  
48 IES-R has good psychometric properties <sup>47</sup>.  
49

50  
51 *Preinjury behavioural and personality measures*  
52

53  
54 *The Swedish Universities Scales of Personality (SSP)*  
55  
56  
57  
58  
59  
60

1  
2  
3 SSP is a personality inventory standardized on a representative sample (n = 741)  
4 from the general Swedish population<sup>48</sup>. The SSP is designed to measure only traits  
5 commonly associated with psychopathology (e.g., anxiety proneness, extraversion,  
6 and aggression-hostility). It consists of 91 items, divided into 13 subscales. Each item  
7 is expressed as a statement to which the respondent has four answers to choose from,  
8 ranging from "Does not apply at all" to "Applies completely." Scores are summed and  
9 transformed to T scores (mean = 50, SD = 10) for men and women separately.  
10  
11  
12  
13  
14  
15  
16  
17

### 18 *The Sense of Coherence Scale (SOC)*

19  
20 The SOC measures psychological resilience to stressful events and was developed by  
21 Antonovsky<sup>49</sup>. The SOC scale contains three subcomponents: comprehensibility,  
22 manageability, and meaningfulness. The scale consists of twenty-nine statements, and  
23 the respondent marks his/her agreement on a seven point Likert scale. It has been used  
24 previously in traumatic brain injury research<sup>50</sup> who found that SOC-score was similar  
25 in a group of individuals with TBI many years post-injury when compared to  
26 nondisabled people. In patients with orthopaedic injuries, a high SOC score predicted  
27 a better outcome after surgery after one year<sup>51</sup>.  
28  
29  
30  
31  
32  
33  
34  
35  
36  
37  
38

### 39 *Alcohol Use Disorders Identification Test (AUDIT)*

40  
41 Screening for hazardous alcohol use was made by use of the Alcohol Use Disorders  
42 Identification Test (AUDIT)<sup>52</sup>. The AUDIT consists of 10 items and measures  
43 alcohol consumption, drinking behaviour, adverse reactions and alcohol related  
44 problems during the last twelve months. Each item is scored from 0 to 4. A cut-off  
45 score of 8 or higher has been shown to have a sensitivity and specificity over 90 % for  
46 hazardous alcohol use<sup>52</sup>. It has been used in previous TBI-research<sup>53,54</sup>.  
47  
48  
49  
50  
51  
52  
53  
54  
55  
56  
57  
58  
59  
60

### ***Patient and public involvement***

The design of the study, the choice of research question and outcome measures, and the recruitment to and conduct of the study was performed by health care professionals with extensive professional experience of work with this group of patients and robust knowledge of previous research in the field. Patients were not involved in this process.

### ***Statistics***

All data were entered and analysed with IBM's SPSS. Categorical variables were summed into frequencies for each group and then analysed with  $\chi^2$ . For tables with small expected cell counts the Fisher exact test was used. For larger contingency tables with ordered data (e.g., length of PTA), the linear-by-linear association test was used.

Numerical variables were first summarized with standard descriptives and checked for skewness. Variables with skewness exceeding significantly above one were subsequently analysed with a non-parametric method (Mann-Whitney). Otherwise, the student's t-test was chosen for comparisons between the two outcome groups. If the Levene's test for equality of variances was found to be violated, a t-statistic not assuming homogeneity of variance was computed. Odds ratios (OR) with confidence intervals (CI) and p-values were calculated using logistic regression. Statistical significance was set at  $p < .05$ , and all tests were two-tailed.

## Results

### *Recruitment and one-year outcome*

A total of 122 patients accepted the invitation and were included in the study. The initial recruitment process, including analysis of acceptance rate and differences between participating and the non-participating patients, is described in previous publications<sup>12,55</sup>.

At the one-year follow up, 94 participants were still in the program (attrition rate 23 percent). The patients who dropped out (n=28) did not differ from remaining patients with respect to sex ( $\chi^2(1) = 1.00, p = .316$ ), age ( $t(120) = 0.41, p = .967$ ) or initial level of experienced symptoms as reported in RPQ ( $t(116) = 1.14, p = .257$ ). However, the patients who dropped out had fewer years of education ( $M = 10.8, SD = 3.6$ ) than remaining patients ( $M = 12.6, SD = 2.6, t(110) = 2.46, p = .015$ ).

Data on RPQ and RHFUQ at one-year post-injury were analysed to create the two outcome groups. In RPQ, fifty patients (53 %) reported having no remaining symptoms at all, an additional twenty-six patients (28 %) reported just one or two remaining symptoms, and eighteen (19 %) reported three or more remaining symptoms. This last number shows a decrease in this cohort from 33 percent PCS-cases at three months post injury<sup>12</sup>, using symptom only criteria. In RHFUQ seventy-eight patients (83%) reported no disability, three patients (3 %) reported just one disability, and the remaining thirteen patients (14 %) reported two or more disabilities. Eleven patients (12 %) matched the combined criteria for PCS which required three or remaining symptoms and two or more remaining disabilities. Remaining patients (n=83) formed the recovered group.

### ***Sociodemographics***

There was a significant association between sex and outcome,  $\chi^2(1) = 5.81, p = .022$ . Based on the odds ratio, women were 4.97 times more likely to end up in the PCS group, 95 % CI [1.22 – 20.17]. There were no significant differences between the two groups with regard to age ( $t(92) = -1.08, p = .281$ ), years of education ( $t(92) = 1.24, p = .218$ ) or marital status ( $\chi^2(1) = 0.53, p = 1.00$ ). The details are presented in Table 1, along with occupational status. Occupational status at the time of injury showed significant differences between the two groups ( $\chi^2(5) = 33.24, p = <.001$ ) and was further analysed by visual inspection. A distinct difference between the two groups was that all students recovered by one year. Patients on sick leave at the time of the injury tended to develop PCS, while those on a pension (both retirement and disability) recovered.

### ***Medical data***

Data regarding acute injury characteristics for the two outcome groups at the one-year follow-up are presented in Table 2. The type of injury event did not affect outcome ( $\chi^2(4) = 6.91, p = .141$ ), nor did a lower GCS score ( $\chi^2(1) = 0.82, p = 1.00$ ). Both loss of consciousness and PTA were divided into manageable time frames and cross-tabulated. No effect was found for loss of consciousness (linear-by-linear association = 0.66,  $p = .417$ ), but longer duration of PTA was associated with recovery (linear-by-linear association = 4.54,  $p = .033$ ). Eleven participants reported retrograde amnesia, four of them longer than five minutes. All of those who reported retrograde amnesia belonged to the recovered group, but it did not reach significance ( $\chi^2(1) = 1.65, p = .351$ ). No effect for alcohol intoxication ( $\chi^2(1) = 1.47, p = .449$ ). Further, alcohol intoxication at the time of injury was not associated with PTA ( $\chi^2(3) = 0.77, p = .857$ ), LOC ( $\chi^2(2) = 2.69, p = .261$ ), or retrograde amnesia ( $\chi^2(1) = 0.25, p = .696$ ). Injury

1  
2  
3 related changes on CT or MRI was evident in eight participants and not related to  
4  
5 outcome ( $\chi^2(1) = 1.50, p = .235$ ), but to a lower initial GCS ( $\chi^2(1) = 5.63, p = .049$ ).  
6  
7 Initial symptom severity, as measured by the RPQ the day after the trauma, showed  
8  
9 excessive skewness and was analysed with Mann-Whitney. The result showed that the  
10  
11 PCS group (Mdn = 68.32) initially experienced significantly more symptoms than the  
12  
13 recovered group (Mdn = 44.14),  $U = 685.50, p = .005, r = 0.29$ .  
14  
15

### 16 ***Psychiatric assessment***

17  
18 Nine out of eleven PCS patients (83 percent) had a previous or concurrent psychiatric  
19  
20 disorder, established at the psychiatric assessment one-week post injury. This was  
21  
22 significantly higher than in the recovered group where only twenty out of 83  
23  
24 participants (24 percent) had a previous or concurrent disorder.  
25  
26

27 Forty-two of the recovered patients and ten of the PCS patients reported psychosocial  
28  
29 stress of at least moderate severity during the year before the injury, ( $\chi^2(1) = 6.38, p =$   
30  
31  $.020$ ). Total number of psychosocial stressors showed excessive skewness and was  
32  
33 analysed with Mann-Whitney. The result showed that the PCS group also reported  
34  
35 more stressors (Mdn = 73.55) than the recovered group (Mdn = 44.05),  $U = 743.00, p =$   
36  
37  $.001, r = 0.36$ . The two self-rated GAF measures showed a negative skewness  
38  
39 exceeding -1 and were consequently analysed with non-parametric analysis (Mann-  
40  
41 Whitney). Patients with PCS had significantly lower self-rated global functioning  
42  
43 (Mdn = 35.61) than patients who had recovered (Mdn = 50.32) for the year before the  
44  
45 injury,  $U = 470.0, z = -2.11, p = .035, r = -0.22$ . For the two weeks before the injury  
46  
47 similar results were obtained with lower scores for patients with PCS (Mdn = 37.44)  
48  
49 than patients who had recovered (Mdn = 49.88), but just short of being significant,  $U$   
50  
51  $= 503.0, z = -1.77, p = .076, r = -0.18$ . The results for the actual ratings are shown in  
52  
53  
54  
55  
56 Table 3.  
57  
58  
59  
60

### ***Preinjury behavioral and personality measures***

Participants who developed PCS reported significantly less resilience for stressful events in the Sense of Coherence Scale than those participants who recovered ( $t(91) = 2.44, p = .018, r = 0.25$ ). When breaking down the results in the three subcomponents of the scale, no significant differences were found concerning experienced comprehensibility or meaningfulness, but in manageability ( $t(91) = 2.79, p = .006, r = 0.28$ ).

To see if personality traits, as measured by the SSP, were associated with outcome, independent samples t-tests were performed. Levene's test for equality of variances was found to be violated for somatic trait anxiety ( $F(92) = 4.61, p = .034$ ), embitterment ( $F(92) = 10.98, p = .001$ ), and physical trait aggressivity ( $F(92) = 4.34, p = 0.40$ ). For these traits, a t-statistic not assuming homogeneity of variance was computed. As can be seen in Table 4, results indicate that patients with PCS had elevated somatic trait anxiety, embitterment, and mistrust when compared with the group who had recovered. Previous alcohol consumption pattern did not differ between the two groups, see Table 3.

### ***Post-injury symptoms***

Both Impact of Event Scale and Hospital Anxiety and Depression Scale showed excessive skewness ( $>1$ ) and was analysed using non-parametric methods (Mann-Whitney). The results showed that patients who developed PCS ( $Mdn = 68.45$ ) reported more initial post-traumatic stress than patients who later recovered ( $Mdn = 44.72, U = 687.00, z = 2.72, p = .007, r = 0.28$ ). Looking further at the subscales revealed that the two groups differed significantly only in hyperarousal, with the PCS group ( $Mdn = 75.91$ ) reporting more distress than the recovered group ( $Mdn = 43.73, U = 769.00, z = 3.74, p = .000, r = 0.39$ ). There were highly significant differences



1  
2  
3 between the two groups on emotional distress as measured by HADS. One-week post  
4 injury, the PCS group ( $Mdn = 72.41$ ) experienced higher levels of anxiety than the  
5 recovered group ( $Mdn = 44.20$ ),  $U = 730.50$ ,  $z = 3.30$ ,  $p = .001$ ,  $r = 0.34$ . The PCS  
6 group ( $Mdn = 72.77$ ) also experienced more symptoms of depression than the  
7 recovered group ( $Mdn = 44.15$ ),  $U = 734.50$ ,  $z = 3.32$ ,  $p = .001$ ,  $r = 0.34$ . The  
8 parametric mean and standard deviation for both scales are shown in table 5.  
9  
10  
11  
12  
13  
14  
15

## 16 17 18 **Discussion**

19  
20 The main purpose of this study was to examine if aspects of emotional reserve were  
21 associated with the development of PCS after mTBI, to complete our previous  
22 findings regarding cognitive reserve in the same cohort<sup>12</sup>. At the one-year follow-up,  
23 twelve percent of this cohort fulfilled our extended criteria for PCS, including both  
24 symptoms and disability.  
25  
26  
27  
28  
29

30  
31 Factors related to the actual injury, so called peri-injury factors, were in general not  
32 related to outcome, with one notable exception: the PCS-group reported more initial  
33 injury symptoms. This could theoretically be interpreted as a sign of severity of the  
34 underlying injury. However, most evidence suggests that objective acute injury  
35 factors are not related to late outcome, so it is unlikely that the actual injury was more  
36 serious. A more feasible view is that the reporting of a large number of initial  
37 symptoms after a mTBI is merely another marker for the pre-injury psychological  
38 vulnerability in the PCS-group, that already at a very early stage after the injury  
39 shapes the emergence and later on the persistence of symptoms and disability.  
40  
41  
42  
43  
44  
45  
46  
47  
48  
49

50  
51 The weight of preinjury factors emerged markedly. The PCS-group reported a  
52 greater number of psychosocial stressors for the year preceding the injury,  
53 corroborating previous findings<sup>56</sup>. We found that individuals with a previous or  
54  
55  
56  
57  
58  
59  
60

1  
2  
3 concurrent psychiatric disorder, or with a family history of such disorder were more  
4 likely to develop PCS. Both GAF ratings were significantly lower, corroborating and  
5 extending earlier findings<sup>13 32 33</sup>. Despite the elevated frequency of 15 percent of  
6 alcohol abuse in the cohort, there were no differences in the number of intoxicated  
7 patients or alcohol abuse between PCS- and recovered patients. Among the post-  
8 injury factors, higher levels of PTSD symptoms as assessed by the IES-R, in  
9 particular the subscale of hyperarousal showed a clear association to PCS. Also, both  
10 anxiety and depression were higher in PCS patients one week after trauma. The  
11 findings are further supported by the design of the study, since data were obtained  
12 within a week after the mTBI, minimizing recall bias and before the development of  
13 prolonged PCS symptoms, minimizing the risk for confirmation bias.

14  
15 We used the Swedish Scales of Personality, the SSP, to measure different  
16 aspects of personality and found in the PCS group elevated level of somatic anxiety,  
17 but not psychic anxiety, compared to the recovered group. The SSP divides trait  
18 anxiety into a psychic and a somatic component<sup>48 57</sup>. This division of anxiety was  
19 first suggested by Eysenck<sup>58</sup> where the somatic component reflects autonomous over-  
20 reactivity, and the mental component reflects brooding and worrying behaviour.  
21 Further, the PCS group had significantly higher levels of mistrust. This SSP-scale has  
22 its origins in the subscale suspicion in the Buss-Durkee Hostility Inventory<sup>59</sup> and  
23 measures traits of being suspicious and distrusting of other people's motives. The  
24 elevated level of embitterment in the PCS group may be linked to coping responses  
25 during stressful life events. The SSP scale can be illustrated by the following item: "I  
26 had often gotten into trouble even when it was not my fault.". Blaming others has  
27 previously been found to influence symptom reporting in mTBI patients<sup>60</sup>. To sum it  
28 up, a pattern of higher reactivity in the autonomic nervous system, and some

1  
2  
3 personality traits (embitterment and suspiciousness) may lead to more stress in  
4  
5 everyday life, and an increased sensitivity when encountering and managing traumatic  
6  
7 events, such as a brain injury.  
8

9  
10 We used a different measure of psychological resilience in connection with  
11  
12 mTBI than other studies<sup>26</sup>, but the findings were similar; lower levels were linked to  
13  
14 PCS development. The three-factor construction of the SOC allows further analysis of  
15  
16 different aspects of resilience: comprehensibility, manageability, and meaningfulness.  
17  
18 We found that only manageability was significantly lower in the PCS group. This  
19  
20 subscale is tapping into an underlying construct of being in control of one's life and a  
21  
22 sense of mastery. To our knowledge, this finding has not been reported before.  
23  
24 Thus, the outcome differed despite seemingly similar brain trauma, highlighting the  
25  
26 importance of biopsychosocial factors for the development of PCS<sup>61</sup>, such as the  
27  
28 extent of cognitive<sup>17</sup> and emotional reserve<sup>36</sup>.  
29  
30

31  
32 As mentioned before, the peri-injury factors were hardly related to outcome in  
33  
34 this study. Injury related changes found on MRI or CT scan and initial lower GCS-  
35  
36 score were not related to PCS, which is in line with previous findings<sup>62 63</sup>. However,  
37  
38 PCS-patients reported a shorter duration of PTA. However, there were only few  
39  
40 individuals with imaging findings and the GCS score was restricted to 14 or 15, so the  
41  
42 sample was too small to enable the detection of differences.  
43  
44

#### 45 ***Strengths and limitations***

46  
47 The study had a prospective design and included all patients within the first 24 hours  
48  
49 after the trauma when injury related factors could be reliably assessed. Preinjury  
50  
51 factors were thoroughly assessed soon after injury, minimizing recall bias<sup>64</sup>. A further  
52  
53 strength is the comprehensive psychiatric assessment by a senior psychiatrist, instead  
54  
55 of solely relying on self-report questionnaires. In previous studies<sup>13 32</sup>, psychiatric  
56  
57  
58  
59  
60

1  
2  
3 assessments have yielded decreased estimates of PCS. The assessment of preinjury  
4 factors was performed without knowledge of late outcome.  
5  
6

7           The small size of the PCS group is a limitation and relevant findings may have  
8 remained undetected due to low power. There is also a substantial lack of precision,  
9 which can be seen in the wide confidence intervals. Larger prospective samples are  
10 thus required to corroborate the present results. Further, the association between  
11 attrition and limited education is problematic, causing restricted generalizability.  
12 Finally, the symptoms and disabilities in the PCS-definition show some overlap with  
13 psychiatric conditions, and previous as well as concurrent psychiatric disorders turned  
14 out to be risk factors for PCS. Given the many other psychosocial determinants for  
15 PCS found in our study, a biopsychosocial approach, taking the psychiatric  
16 comorbidities into account, is likely to yield the most thorough understanding of the  
17 emergence and persistence of symptoms and disability after mTBI.  
18  
19  
20  
21  
22  
23  
24  
25  
26  
27  
28  
29  
30

31           In conclusion, the present findings fit and extend Gallo and Matthews'<sup>20</sup>  
32 Reserve-Capacity Model demonstrating a link between psychosocial adjustment and  
33 specific symptom development after an injury. The results demonstrate the  
34 importance of intra-personal emotional reserve for symptom development along with  
35 cognitive reserve, complementing our previous findings. Thus, the variations seen in  
36 outcome after mTBI may to a considerable degree reflect individual differences in  
37 emotional and cognitive coping ability. The results highlight the importance of  
38 considering psychiatric history when identifying patients at risk of developing PCS  
39 and emphasize the value of considering these pre-injury factors in clinical  
40 management.  
41  
42  
43  
44  
45  
46  
47  
48  
49  
50  
51  
52  
53  
54  
55  
56  
57  
58  
59  
60

## Author Statement

CO, AL and AB conceived of the present study. AL, GE, CNDB and AB initiated the study design. AL and CNDB contributed to data collection. GE provided statistical expertise. All authors contributed to the interpretation of the study results as well as the writing of the manuscript. All authors have read and agree with the manuscript's final content.

## Competing interests

The authors report no competing interest.

## Funding

This study was supported by grants from:

- The Swedish insurance company AFA
- Hjärnskadeförbundet Hjärnkraft, a Swedish organization for people with acquired brain injury
- The Promobilia Foundation
- Svenska Läkaresällskapet (The Swedish Medical Association)

## Data sharing statement

There are no unpublished data available.

## Acknowledgments

The authors wish to thank professor emeritus Jörgen Borg, the primary investigator of the original study, Seija Lundh, reg nurse and Daniel Karlsted and Siw Evans, lic

1  
2  
3  
4  
5  
6  
7  
8  
9  
10  
11  
12  
13  
14  
15  
16  
17  
18  
19  
20  
21  
22  
23  
24  
25  
26  
27  
28  
29  
30  
31  
32  
33  
34  
35  
36  
37  
38  
39  
40  
41  
42  
43  
44  
45  
46  
47  
48  
49  
50  
51  
52  
53  
54  
55  
56  
57  
58  
59  
60

psychologists for their contribution during recruitment and data collection, and all participants who devoted time and engagement to make this study possible.

For peer review only

## References

1. Carroll LJ, Cassidy JD, Peloso PM, et al. Prognosis for mild traumatic brain injury: results of the WHO Collaborating Centre Task Force on Mild Traumatic Brain Injury. *J Rehabil Med* 2004(43 Suppl):84-105. [published Online First: 2004/04/16]
2. Cassidy JD, Cancelliere C, Carroll LJ, et al. Systematic review of self-reported prognosis in adults after mild traumatic brain injury: results of the International Collaboration on Mild Traumatic Brain Injury Prognosis. *Archives of physical medicine and rehabilitation* 2014;95(3 Suppl):S132-51. doi: 10.1016/j.apmr.2013.08.299 [published Online First: 2014/03/04]
3. Lannsjö M, af Geijerstam JL, Johansson U, et al. Prevalence and structure of symptoms at 3 months after mild traumatic brain injury in a national cohort. *Brain Inj* 2009;23(3):213-9. doi: 10.1080/02699050902748356 [published Online First: 2009/02/12]
4. Dischinger PC, Ryb GE, Kufera JA, et al. Early predictors of postconcussive syndrome in a population of trauma patients with mild traumatic brain injury. *J Trauma* 2009;66(2):289-96; discussion 96-7. doi: 10.1097/TA.0b013e3181961da2 [published Online First: 2009/02/11]
5. Elgmark Andersson E, Emanuelson I, Bjorklund R, et al. Mild traumatic brain injuries: the impact of early intervention on late sequelae. A randomized controlled trial. *Acta Neurochir (Wien)* 2007;149(2):151-9; discussion 60. doi: 10.1007/s00701-006-1082-0 [published Online First: 2007/01/26]
6. Andersson EE, Bedics BK, Falkmer T. Mild traumatic brain injuries: a 10-year follow-up. *J Rehabil Med* 2011;43(4):323-9. doi: 10.2340/16501977-0666 [published Online First: 2011/01/29]
7. Belanger HG, Curtiss G, Demery JA, et al. Factors moderating neuropsychological outcomes following mild traumatic brain injury: a meta-analysis. *J Int Neuropsychol Soc* 2005;11(3):215-27. doi: 10.1017/S1355617705050277 [published Online First: 2005/05/17]
8. Binder LM. A review of mild head trauma. Part II: Clinical implications. *Journal of clinical and experimental neuropsychology* 1997;19(3):432-57. doi: 10.1080/01688639708403871 [published Online First: 1997/06/01]
9. Frencham KA, Fox AM, Maybery MT. Neuropsychological studies of mild traumatic brain injury: a meta-analytic review of research since 1995. *Journal of clinical and experimental neuropsychology* 2005;27(3):334-51. doi: 10.1080/13803390490520328 [published Online First: 2005/06/23]
10. Schretlen DJ, Shapiro AM. A quantitative review of the effects of traumatic brain injury on cognitive functioning. *Int Rev Psychiatry* 2003;15(4):341-9. doi: 10.1080/09540260310001606728 [published Online First: 2004/07/28]
11. Godbolt AK, Cancelliere C, Hincapie CA, et al. Systematic review of the risk of dementia and chronic cognitive impairment after mild traumatic brain injury: results of the International Collaboration on Mild Traumatic Brain Injury Prognosis. *Archives of physical medicine and rehabilitation* 2014;95(3 Suppl):S245-56. doi: 10.1016/j.apmr.2013.06.036 [published Online First: 2014/03/04]
12. Oldenburg C, Lundin A, Edman G, et al. Cognitive reserve and persistent post-concussion symptoms--A prospective mild traumatic brain injury (mTBI) cohort study. *Brain Inj* 2016;30(2):146-55. doi: 10.3109/02699052.2015.1089598 [published Online First: 2015/12/01]

13. Luis CA, Vanderploeg RD, Curtiss G. Predictors of postconcussion symptom complex in community dwelling male veterans. *J Int Neuropsychol Soc* 2003;9(7):1001-15. doi: 10.1017/S1355617703970044 [published Online First: 2004/01/24]
14. Fay TB, Yeates KO, Taylor HG, et al. Cognitive reserve as a moderator of postconcussive symptoms in children with complicated and uncomplicated mild traumatic brain injury. *J Int Neuropsychol Soc* 2010;16(1):94-105. doi: 10.1017/S1355617709991007 [published Online First: 2009/10/20]
15. Stulemeijer M, van der Werf S, Borm GF, et al. Early prediction of favourable recovery 6 months after mild traumatic brain injury. *J Neurol Neurosurg Psychiatry* 2008;79(8):936-42. doi: 10.1136/jnnp.2007.131250 [published Online First: 2007/10/24]
16. Satz P. Brain reserve capacity on symptom onset after brain injury: A formulation and review of evidence for threshold theory. *Neuropsychology* 1993;7(3):273-95. doi: 10.1037/0894-4105.7.3.273
17. Bigler ED, Stern Y. Traumatic brain injury and reserve. *Handb Clin Neurol* 2015;128:691-710. doi: 10.1016/B978-0-444-63521-1.00043-1 [published Online First: 2015/02/24]
18. Stern Y. Cognitive reserve. *Neuropsychologia* 2009;47(10):2015-28. doi: 10.1016/j.neuropsychologia.2009.03.004 [published Online First: 2009/05/27]
19. Feinstein JS. The relationship between socioeconomic status and health: a review of the literature. *Milbank Q* 1993;71(2):279-322. [published Online First: 1993/01/01]
20. Gallo LC, Matthews KA. Understanding the association between socioeconomic status and physical health: do negative emotions play a role? *Psychol Bull* 2003;129(1):10-51. [published Online First: 2003/01/31]
21. Kay T, Newman B, Cavallo M, et al. Toward a Neuropsychological model of functional disability after mild traumatic brain injury. *Neuropsychology* 1992;6(4):371-84.
22. Rush BK, Malec JF, Moessner AM, et al. Preinjury Personality Traits and the Prediction of Early Neurobehavioral Symptoms Following Mild Traumatic Brain Injury. *Rehabilitation Psychology* 2004;49(4):275-81. doi: 10.1037/0090-5550.49.4.275
23. Garden N, Sullivan KA, Lange RT. The relationship between personality characteristics and postconcussion symptoms in a nonclinical sample. *Neuropsychology* 2010;24(2):168-75. doi: 10.1037/a0017431 [published Online First: 2010/03/17]
24. Yuen KM, Tsai YH, Lin WC, et al. Retrospectively evaluated preinjury personality traits influence postconcussion symptoms. *Applied neuropsychology Adult* 2016;23(5):322-32. doi: 10.1080/23279095.2015.1057638 [published Online First: 2016/01/21]
25. Losoi H, Silverberg ND, Waljas M, et al. Resilience Is Associated with Outcome from Mild Traumatic Brain Injury. *Journal of neurotrauma* 2015;32(13):942-9. doi: 10.1089/neu.2014.3799 [published Online First: 2015/03/13]
26. Sullivan KA, Kempe CB, Edmed SL, et al. Resilience and Other Possible Outcomes After Mild Traumatic Brain Injury: a Systematic Review. *Neuropsychol Rev* 2016;26(2):173-85. doi: 10.1007/s11065-016-9317-1 [published Online First: 2016/05/08]
27. Sullivan KA, Edmed SL, Allan AC, et al. The role of psychological resilience and mTBI as predictors of postconcussional syndrome symptomatology. *Rehabil*



- 1  
2  
3 *Psychol* 2015;60(2):147-54. doi: 10.1037/rep0000037 [published Online First:  
4 2015/03/31]
- 5 28. Merritt VC, Lange RT, French LM. Resilience and symptom reporting following  
6 mild traumatic brain injury in military service members. *Brain Inj*  
7 2015;29(11):1325-36. doi: 10.3109/02699052.2015.1043948 [published  
8 Online First: 2015/07/24]
- 9 29. McCauley SR, Wilde EA, Miller ER, et al. Preinjury resilience and mood as  
10 predictors of early outcome following mild traumatic brain injury. *Journal of*  
11 *neurotrauma* 2013;30(8):642-52. doi: 10.1089/neu.2012.2393 [published  
12 Online First: 2012/10/11]
- 13 30. King NS. Post-concussion syndrome: clarity amid the controversy? *Br J*  
14 *Psychiatry* 2003;183(4):276-8. doi: 10.1192/bjp.183.4.276 [published Online  
15 First: 2003/10/02]
- 16 31. Meares S, Shores EA, Taylor AJ, et al. Mild traumatic brain injury does not  
17 predict acute postconcussion syndrome. *J Neurol Neurosurg Psychiatry*  
18 2008;79(3):300-6. doi: 10.1136/jnnp.2007.126565 [published Online First:  
19 2007/08/19]
- 20 32. Meares S, Shores EA, Taylor AJ, et al. The prospective course of postconcussion  
21 syndrome: the role of mild traumatic brain injury. *Neuropsychology*  
22 2011;25(4):454-65. doi: 10.1037/a0022580 [published Online First:  
23 2011/05/18]
- 24 33. Ponsford J, Willmott C, Rothwell A, et al. Factors influencing outcome following  
25 mild traumatic brain injury in adults. *J Int Neuropsychol Soc* 2000;6(5):568-  
26 79. doi: 10.1017/S1355617700655066 [published Online First: 2000/08/10]
- 27 34. Snell DL, Siegert RJ, Hay-Smith EJ, et al. Associations between illness  
28 perceptions, coping styles and outcome after mild traumatic brain injury:  
29 preliminary results from a cohort study. *Brain Inj* 2011;25(11):1126-38. doi:  
30 10.3109/02699052.2011.607786 [published Online First: 2011/08/30]
- 31 35. American Psychiatric Association. Diagnostic and statistical manual of mental  
32 disorders : DSM-IV-TR. 4th ed. Washington, DC: American Psychiatric  
33 Association 2000.
- 34 36. Sela-Kaufman M, Rassovsky Y, Agranov E, et al. Premorbid personality  
35 characteristics and attachment style moderate the effect of injury severity on  
36 occupational outcome in traumatic brain injury: another aspect of reserve.  
37 *Journal of clinical and experimental neuropsychology* 2013;35(6):584-95. doi:  
38 10.1080/13803395.2013.799123 [published Online First: 2013/05/25]
- 39 37. Nygren De Boussard C, Fredman P, Lundin A, et al. S100 in mild traumatic brain  
40 injury. *Brain Inj* 2004;18(7):671-83. doi: 10.1080/02699050310001646215  
41 [published Online First: 2004/06/19]
- 42 38. Gomez PA, Lobato RD, Ortega JM, et al. Mild head injury: differences in  
43 prognosis among patients with a Glasgow Coma Scale score of 13 to 15 and  
44 analysis of factors associated with abnormal CT findings. *Br J Neurosurg*  
45 1996;10(5):453-60. [published Online First: 1996/10/01]
- 46 39. Uchino Y, Okimura Y, Tanaka M, et al. Computed tomography and magnetic  
47 resonance imaging of mild head injury--is it appropriate to classify patients  
48 with Glasgow Coma Scale score of 13 to 15 as "mild injury"? *Acta Neurochir*  
49 *(Wien)* 2001;143(10):1031-7. [published Online First: 2001/10/31]
- 50 40. American Psychiatric Association. Diagnostic and statistical manual of mental  
51 disorders: DSM-III-R. 3 rev ed. Cambridge 1987.
- 52  
53  
54  
55  
56  
57  
58  
59  
60

- 1
  - 2
  - 3
  - 4
  - 5
  - 6
  - 7
  - 8
  - 9
  - 10
  - 11
  - 12
  - 13
  - 14
  - 15
  - 16
  - 17
  - 18
  - 19
  - 20
  - 21
  - 22
  - 23
  - 24
  - 25
  - 26
  - 27
  - 28
  - 29
  - 30
  - 31
  - 32
  - 33
  - 34
  - 35
  - 36
  - 37
  - 38
  - 39
  - 40
  - 41
  - 42
  - 43
  - 44
  - 45
  - 46
  - 47
  - 48
  - 49
  - 50
  - 51
  - 52
  - 53
  - 54
  - 55
  - 56
  - 57
  - 58
  - 59
  - 60
41. King NS, Crawford S, Wenden FJ, et al. The Rivermead Post Concussion Symptoms Questionnaire: a measure of symptoms commonly experienced after head injury and its reliability. *J Neurol* 1995;242(9):587-92. [published Online First: 1995/09/01]
42. Crawford S, Wenden FJ, Wade DT. The Rivermead head injury follow up questionnaire: a study of a new rating scale and other measures to evaluate outcome after head injury. *J Neurol Neurosurg Psychiatry* 1996;60(5):510-4. [published Online First: 1996/05/01]
43. Zigmond AS, Snaith RP. The hospital anxiety and depression scale. *Acta Psychiatr Scand* 1983;67(6):361-70. [published Online First: 1983/06/01]
44. Herrmann C. International experiences with the Hospital Anxiety and Depression Scale--a review of validation data and clinical results. *J Psychosom Res* 1997;42(1):17-41. [published Online First: 1997/01/01]
45. Bjelland I, Dahl AA, Haug TT, et al. The validity of the Hospital Anxiety and Depression Scale. An updated literature review. *J Psychosom Res* 2002;52(2):69-77. [published Online First: 2002/02/08]
46. Weiss DS, Marmar CR. The Impact of Event Scale - Revised. In: Wilson JP, Keane TM, eds. *Assessing psychological trauma and PTSD: A Practitioner's Handbook*. New York: Guilford Press 1997:399-411.
47. Sundin EC, Horowitz MJ. Impact of Event Scale: psychometric properties. *Br J Psychiatry* 2002;180:205-9. [published Online First: 2002/03/02]
48. Gustavsson JP, Bergman H, Edman G, et al. Swedish universities Scales of Personality (SSP): construction, internal consistency and normative data. *Acta Psychiatr Scand* 2000;102(3):217-25. [published Online First: 2000/09/29]
49. Antonovsky A. The structure and properties of the sense of coherence scale. *Soc Sci Med* 1993;36(6):725-33. [published Online First: 1993/03/01]
50. Jacobsson LJ, Westerberg M, Malec JF, et al. Sense of coherence and disability and the relationship with life satisfaction 6-15 years after traumatic brain injury in northern Sweden. *Neuropsychol Rehabil* 2011;21(3):383-400. doi: 10.1080/09602011.2011.566711 [published Online First: 2011/04/12]
51. Ristner G, Andersson R, Johansson LM, et al. Sense of coherence and lack of control in relation to outcome after orthopaedic injuries. *Injury* 2000;31(10):751-6. [published Online First: 2001/01/13]
52. Saunders JB, Aasland OG, Babor TF, et al. Development of the Alcohol Use Disorders Identification Test (AUDIT): WHO Collaborative Project on Early Detection of Persons with Harmful Alcohol Consumption--II. *Addiction* 1993;88(6):791-804. [published Online First: 1993/06/01]
53. Ponsford J, Whelan-Goodinson R, Bahar-Fuchs A. Alcohol and drug use following traumatic brain injury: a prospective study. *Brain Inj* 2007;21(13-14):1385-92. doi: 10.1080/02699050701796960 [published Online First: 2007/12/11]
54. Ponsford J, Tweedly L, Taffe J. The relationship between alcohol and cognitive functioning following traumatic brain injury. *Journal of clinical and experimental neuropsychology* 2013;35(1):103-12. doi: 10.1080/13803395.2012.752437 [published Online First: 2013/01/24]
55. Lundin A, de Boussard C, Edman G, et al. Symptoms and disability until 3 months after mild TBI. *Brain Inj* 2006;20(8):799-806. doi: 10.1080/02699050600744327 [published Online First: 2006/10/25]
56. van Veldhoven LM, Sander AM, Struchen MA, et al. Predictive ability of preinjury stressful life events and post-traumatic stress symptoms for

- 1  
2  
3 outcomes following mild traumatic brain injury: analysis in a prospective  
4 emergency room sample. *J Neurol Neurosurg Psychiatry* 2011;82(7):782-7.  
5 doi: 10.1136/jnnp.2010.228254 [published Online First: 2011/01/19]
- 6 57. Schalling D, Asberg M, Edman G, et al. Markers for vulnerability to  
7 psychopathology: temperament traits associated with platelet MAO activity.  
8 *Acta Psychiatr Scand* 1987;76(2):172-82. [published Online First: 1987/08/01]
- 9 58. Eysenck HJ. Handbook of abnormal psychology, an experimental approach. 1st  
10 ed. New York,: Basic Books 1961.
- 11 59. Buss AH, Durkee A. An inventory for assessing different kinds of hostility. *J*  
12 *Consult Psychol* 1957;21(4):343-9. [published Online First: 1957/08/01]
- 13 60. Rutherford WH. Sequelae of concussion caused by minor head injuries. *Lancet*  
14 1977;1(8001):1-4. [published Online First: 1977/01/01]
- 15 61. Iverson GL, Silverberg N, Lange RT, et al. Conceptualizing Outcome from Mild  
16 Traumatic Brain Injury. In: Zasler ND, Katz DI, Zafonte RD, eds. Brain Injury  
17 Medicine - Principles and Practice. 2 ed. New York: Demos Medical  
18 Publishing 2013.
- 19 62. Lannsjo M, Backheden M, Johansson U, et al. Does head CT scan pathology  
20 predict outcome after mild traumatic brain injury? *Eur J Neurol*  
21 2013;20(1):124-9. doi: 10.1111/j.1468-1331.2012.03813.x [published Online  
22 First: 2012/07/21]
- 23 63. Iverson GL, Lange RT, Waljas M, et al. Outcome from Complicated versus  
24 Uncomplicated Mild Traumatic Brain Injury. *Rehabil Res Pract*  
25 2012;2012:415740. doi: 10.1155/2012/415740 [published Online First:  
26 2012/05/12]
- 27 64. Ferguson RJ, Mittenberg W, Barone DF, et al. Postconcussion syndrome  
28 following sports-related head injury: Expectation as etiology.  
29 *Neuropsychology* 1999;13(4):582-89. doi: 10.1037/0894-4105.13.4.582  
30  
31  
32  
33  
34  
35  
36  
37  
38  
39  
40  
41  
42  
43  
44  
45  
46  
47  
48  
49  
50  
51  
52  
53  
54  
55  
56  
57  
58  
59  
60

1  
2  
3  
4  
5  
6  
7  
8  
9  
10  
11  
12  
13  
14  
15  
16  
17  
18  
19  
20  
21  
22  
23  
24  
25  
26  
27  
28  
29  
30  
31  
32  
33  
34  
35  
36  
37  
38  
39  
40  
41  
42  
43  
44  
45  
46  
47  
48  
49  
50  
51  
52  
53  
54  
55  
56  
57  
58  
59  
60

For peer review only

Table 1: Sociodemographic characteristics of mTBI patients split into recovered by one year and those who reported both symptoms and disability (PCS).

| Characteristic                | Recovered<br>( <i>n</i> = 83) | PCS<br>( <i>n</i> = 11) |
|-------------------------------|-------------------------------|-------------------------|
| Age, Mean (SD)                | 36.7 (15.2)                   | 41.9 (13.2)             |
| Sex, n (%)                    |                               |                         |
| Male                          | 54 (65)                       | 3 (27)                  |
| Female                        | 29 (35)                       | 8 (73)                  |
| Marital status, n (%)         |                               |                         |
| Unmarried, living alone       | 20 (24)                       | 3 (27)                  |
| Married, living together      | 63 (76)                       | 8 (73)                  |
| Years of education, Mean (SD) | 12.7 (2.6)                    | 11.6 (2.7)              |
| Occupational status, n (%)    |                               |                         |
| Working                       | 63 (76)                       | 6 (55)                  |
| Studying                      | 15 (18)                       | 0 (0)                   |
| Unemployed                    | 0 (0)                         | 1 (9)                   |
| Sick leave                    | 1 (1)                         | 4 (36)                  |
| Disability pension            | 2 (2)                         | 0 (0)                   |
| Retirement pension            | 2 (2)                         | 0 (0)                   |

Table 2: Peri-injury data for the those who had recovered by one year, and those who still reported post concussive symptoms (PCS).

| Characteristics                      | Recovered<br>(n=83) | PCS<br>(n=11) |
|--------------------------------------|---------------------|---------------|
| Type of injury event, n (%)          |                     |               |
| Fall from height                     | 31 (37)             | 3 (27)        |
| Fall from the same level             | 17 (20)             | 1 (9)         |
| Traffic                              | 17 (20)             | 3 (27)        |
| Assaults                             | 9 (11)              | 0 (0)         |
| Other                                | 9 (11)              | 4 (36)        |
| Loss of Consciousness, n (%)         |                     |               |
| < 1 minute                           | 37 (45)             | 5 (45)        |
| 1-5 minutes                          | 31 (37)             | 6 (55)        |
| 6-30 minutes                         | 15 (18)             | 0 (0)         |
| Post-traumatic amnesia, n (%)        |                     |               |
| < 1 minute                           | 10 (12)             | 4 (36)        |
| 1-5 minutes                          | 19 (23)             | 4 (36)        |
| 6-45 minutes                         | 34 (41)             | 1 (9)         |
| > 45 minutes                         | 20 (24)             | 2 (18)        |
| GCS Score, n (%)                     |                     |               |
| 15                                   | 73 (88)             | 10 (91)       |
| 14                                   | 10 (12)             | 1 (9)         |
| Retrograde amnesia                   | 11 (13)             | 0 (0)         |
| Injury related changes on CT or MRI  | 6 (7)               | 2 (18)        |
| Intoxicated by alcohol, n (%)        | 22 (27)             | 1 (9)         |
| Initial symptom severity*, Mean (SD) | 10.4 (9.3)          | 23.8 (17.0)   |

Note: Initial symptom severity was measured by the Rivermead Post Concussion Symptoms Questionnaire (RPQ). There was one missing protocol from the recovered group. The variable showed excessive skewness and Mann-Whitney was used as statistical method. However, here the values are shown since they are considered more informative.

Table 3: Pre-injury variables for mTBI patients split into those who had recovered by one year and those who reported both symptoms and disability (PCS). Odds ratios (OR) with confidence intervals (CI) and p-values are calculated using logistic regression.

| Variables                                    | Recovered<br>(n=83) | PCS<br>(n=11) | OR (CI)           | p     |
|----------------------------------------------|---------------------|---------------|-------------------|-------|
| Previous or concurrent psych disorder, n (%) | 20 (24)             | 9 (82)        | 14.2 (2.8 – 71.1) | .001  |
| Previous psych disorder                      | 16 (19)             | 7 (64)        | 7.3 (1.9 – 28.1)  | .004  |
| Concurrent psych. disorder                   | 8 (10)              | 7 (64)        | 16.4 (3.9 – 68.5) | <.001 |
| Family history of psych disorder             | 17 (20)             | 4 (36)        | 2.4 (0.9 – 6.3)   | .077  |
| Self-assessed GAF, Mean (SD)                 |                     |               |                   |       |
| The year before the injury                   | 86.2 (11.5)         | 67.3 (21.5)   | 0.9 (0.8 – 1.0)   | <.001 |
| The two weeks before the injury              | 87.1 (11.1)         | 73.2 (20.3)   | 0.9 (0.8 – 1.0)   | .003  |
| Previous mild traumatic brain injury         | 4 (5)               | 2 (18)        | 4.3 (0.6 – 27.1)  | .117  |
| Alcohol consumption (Audit)                  |                     |               |                   |       |
| Mean (SD)                                    | 5.0 (4.2)           | 5.5 (8.1)     | 1.0 (0.8 -1.2)    | .748  |
| Eight or above, n (%)                        | 13 (17)             | 1 (10)        | 0.5 (0.0 – 4.7)   | .573  |
| Number of psychosocial stressors, Mean (SD)  | 1.30 (1.40)         | 3.73 (2.15)   | 2.1 (1.4 – 3.1)   | <.001 |

Note: There were eight missing questionnaires for Audit (seven for the recovered and one for the PCS group). There was one missing questionnaire for Sense of Coherence Scale.

Table 4: Mean T-scores for the Swedish universities scales of personality completed one week post injury, split into those who had recovered by one year and those who reported both symptoms and disability (PCS).

| Personality variable        | Recovered<br>( <i>n</i> =83) |           | PCS<br>( <i>n</i> =11) |           | <i>p</i> | Cohen's<br><i>d</i> |
|-----------------------------|------------------------------|-----------|------------------------|-----------|----------|---------------------|
|                             | <i>M</i>                     | <i>SD</i> | <i>M</i>               | <i>SD</i> |          |                     |
| Anxiety proneness           |                              |           |                        |           |          |                     |
| Somatic trait anxiety       | 45,3                         | 7,8       | 53,8                   | 11,0      | .030     | 0.89                |
| Psychic trait anxiety       | 45,4                         | 9,1       | 49,8                   | 11,6      | .156     | 0.42                |
| Stress susceptibility       | 46,9                         | 10,4      | 52,1                   | 15,1      | .145     | 0.40                |
| Low assertiveness           | 46,8                         | 9,7       | 43,9                   | 10,5      | .362     | -0.04               |
| Extraversion                |                              |           |                        |           |          |                     |
| Impulsivity                 | 51,8                         | 9,4       | 54,5                   | 12,6      | .400     | 0.23                |
| Adventure seeking           | 54,1                         | 9,3       | 55,9                   | 7,7       | .558     | 0.21                |
| Detachment                  | 44,2                         | 8,7       | 47,7                   | 8,9       | .216     | 0.40                |
| Embitterment                | 46,7                         | 8,4       | 59,3                   | 15,3      | .022     | 1.02                |
| Social desirability         | 54,4                         | 9,7       | 51,3                   | 9,6       | .311     | -0.32               |
| Aggression-Hostility        |                              |           |                        |           |          |                     |
| Verbal trait aggressivity   | 50,4                         | 8,4       | 51,0                   | 11,1      | .823     | 0.06                |
| Physical trait aggressivity | 47,2                         | 9,0       | 53,6                   | 14,6      | .185     | 0.53                |
| Trait irritability          | 46,2                         | 10,9      | 52,0                   | 14,6      | .112     | 0.45                |
| Mistrust                    | 44,5                         | 10,7      | 55,1                   | 13,2      | .004     | 0.88                |



Table 5: The results from measures of post-traumatic and emotional symptoms at one week post injury for the two outcome groups: recovered and those who still reported symptoms and disability (PCS) at one year post injury. Odds ratios (OR) with confidence intervals (CI) and p-values are calculated using logistic regression.

| Variable                              | Recovered<br>(n=83) |           | PCS<br>(n=11) |           | OR (CI)         | p     |
|---------------------------------------|---------------------|-----------|---------------|-----------|-----------------|-------|
|                                       | <i>M</i>            | <i>SD</i> | <i>M</i>      | <i>SD</i> |                 |       |
| Impact of Event Scale                 |                     |           |               |           |                 |       |
| Intrusions                            | 6.2                 | 5.4       | 15.2          | 14.7      | 1.1 (1.0 – 1.2) | .002  |
| Avoidance                             | 4.8                 | 6.7       | 9.3           | 10.2      | 1.1 (1.0 – 1.2) | .070  |
| Hyper-arousal                         | 3.5                 | 4.3       | 12.4          | 8.7       | 1.2 (1.1 - 1.4) | <.001 |
| Total                                 | 14.5                | 14.5      | 36.8          | 30.0      | 1.1 (1.0 – 1.1) | .001  |
| Hospital Anxiety and Depression Scale |                     |           |               |           |                 |       |
| Anxiety                               | 2.7                 | 3.3       | 8.4           | 5.7       | 1.3 (1.1 – 1.6) | <.001 |
| Depression                            | 2.2                 | 2.6       | 6.7           | 4.7       | 1.4 (1.1 – 1.7) | <.001 |

## STROBE Statement—checklist of items that should be included in reports of observational studies

|                              | <b>Item No</b> | <b>Recommendation</b>                                                                                                                                                                                                                                                                                                                                                                                                                                                                                      |
|------------------------------|----------------|------------------------------------------------------------------------------------------------------------------------------------------------------------------------------------------------------------------------------------------------------------------------------------------------------------------------------------------------------------------------------------------------------------------------------------------------------------------------------------------------------------|
| <b>Title and abstract</b>    | 1              | (a) Indicate the study's design with a commonly used term in the title or the abstract<br><b>Page 1</b><br>(b) Provide in the abstract an informative and balanced summary of what was done and what was found<br><b>Page 2</b>                                                                                                                                                                                                                                                                            |
| <b>Introduction</b>          |                |                                                                                                                                                                                                                                                                                                                                                                                                                                                                                                            |
| Background/rationale         | 2              | Explain the scientific background and rationale for the investigation being reported<br><b>Pages 4-7</b>                                                                                                                                                                                                                                                                                                                                                                                                   |
| Objectives                   | 3              | State specific objectives, including any prespecified hypotheses<br><b>Page 7</b>                                                                                                                                                                                                                                                                                                                                                                                                                          |
| <b>Methods</b>               |                |                                                                                                                                                                                                                                                                                                                                                                                                                                                                                                            |
| Study design                 | 4              | Present key elements of study design early in the paper<br><b>Page 8</b>                                                                                                                                                                                                                                                                                                                                                                                                                                   |
| Setting                      | 5              | Describe the setting, locations, and relevant dates, including periods of recruitment, exposure, follow-up, and data collection<br><b>Page 8-9</b>                                                                                                                                                                                                                                                                                                                                                         |
| Participants                 | 6              | (a) <i>Cohort study</i> —Give the eligibility criteria, and the sources and methods of selection of participants. Describe methods of follow-up<br><b>Page 8-9</b>                                                                                                                                                                                                                                                                                                                                         |
| Variables                    | 7              | Clearly define all outcomes, exposures, predictors, potential confounders, and effect modifiers. Give diagnostic criteria, if applicable<br><b>Page 8</b>                                                                                                                                                                                                                                                                                                                                                  |
| Data sources/<br>measurement | 8*             | For each variable of interest, give sources of data and details of methods of assessment (measurement). Describe comparability of assessment methods if there is more than one group<br><b>Pages 9-12</b>                                                                                                                                                                                                                                                                                                  |
| Bias                         | 9              | Describe any efforts to address potential sources of bias<br><b>Participant bias:</b><br><b>Recall bias – page 3</b><br><b>Confirmation bias, social desirability and fatigue page 9</b><br><br><b>Selection bias –</b><br><b>participation, representativity page 9</b><br><b>analysis of differences between participating and nonparticipating patients and between participants and drop – outs – page 13</b><br><b>Researcher bias: Early data collection minimizes bias – study design – page 18</b> |
| Study size                   | 10             | Explain how the study size was arrived at<br><b>Page 8</b>                                                                                                                                                                                                                                                                                                                                                                                                                                                 |
| Quantitative variables       | 11             | Explain how quantitative variables were handled in the analyses. If applicable, describe which groupings were chosen and why<br><b>Page 12</b>                                                                                                                                                                                                                                                                                                                                                             |
| Statistical methods          | 12             | (a) Describe all statistical methods, including those used to control for confounding                                                                                                                                                                                                                                                                                                                                                                                                                      |

1  
2 **Page 12**

---

3 (b) Describe any methods used to examine subgroups and interactions

4 N/A

---

5 (c) Explain how missing data were addressed

6 **We used an unbiased approach, and stated where there were missing data in**  
7 **the tables, see table 2 and 3.**

---

8 (d) *Cohort study*—If applicable, explain how loss to follow-up was addressed

9 **Page 13**

---

10 (e) Describe any sensitivity analyses

11 N/A  
12  
13  
14  
15  
16  
17  
18  
19  
20  
21  
22  
23  
24  
25  
26  
27  
28  
29  
30  
31  
32  
33  
34  
35  
36  
37  
38  
39  
40  
41  
42  
43  
44  
45  
46  
47  
48  
49  
50  
51  
52  
53  
54  
55  
56  
57  
58  
59  
60

1  
2  
3  
4  
5  
6  
7  
8  
9  
10  
11  
12  
13  
14  
15  
16  
17  
18  
19  
20  
21  
22  
23  
24  
25  
26  
27  
28  
29  
30  
31  
32  
33  
34  
35  
36  
37  
38  
39  
40  
41  
42  
43  
44  
45  
46  
47  
48  
49  
50  
51  
52  
53  
54  
55  
56  
57  
58  
59  
60

## Results

|                          |     |                                                                                                                                                                                                                                                                                                                                                                                                                                                                                                  |
|--------------------------|-----|--------------------------------------------------------------------------------------------------------------------------------------------------------------------------------------------------------------------------------------------------------------------------------------------------------------------------------------------------------------------------------------------------------------------------------------------------------------------------------------------------|
| Participants             | 13* | (a) Report numbers of individuals at each stage of study—eg numbers potentially eligible, examined for eligibility, confirmed eligible, included in the study, completing follow-up, and analysed<br><b>Page 13</b><br>(b) Give reasons for non-participation at each stage<br><b>Page 13</b><br>(c) Consider use of a flow diagram<br>N/A                                                                                                                                                       |
| Descriptive data         | 14* | (a) Give characteristics of study participants (eg demographic, clinical, social) and information on exposures and potential confounders<br><b>Page 14, Table 1.</b><br>(b) Indicate number of participants with missing data for each variable of interest<br><b>See Table 2 and 3.</b><br>(c) <i>Cohort study</i> —Summarise follow-up time (eg, average and total amount)<br><b>Page 9</b>                                                                                                    |
| Outcome data             | 15* | <i>Cohort study</i> —Report numbers of outcome events or summary measures over time<br><b>Page 15</b>                                                                                                                                                                                                                                                                                                                                                                                            |
| Main results             | 16  | (a) Give unadjusted estimates and, if applicable, confounder-adjusted estimates and their precision (eg, 95% confidence interval). Make clear which confounders were adjusted for and why they were included<br><b>We have only included unadjusted estimates.</b><br>(b) Report category boundaries when continuous variables were categorized<br><b>Pages 12-13</b><br>(c) If relevant, consider translating estimates of relative risk into absolute risk for a meaningful time period<br>N/A |
| Other analyses           | 17  | Report other analyses done—eg analyses of subgroups and interactions, and sensitivity analyses<br>N/A                                                                                                                                                                                                                                                                                                                                                                                            |
| <b>Discussion</b>        |     |                                                                                                                                                                                                                                                                                                                                                                                                                                                                                                  |
| Key results              | 18  | Summarise key results with reference to study objectives<br><b>Pages 17-18</b>                                                                                                                                                                                                                                                                                                                                                                                                                   |
| Limitations              | 19  | Discuss limitations of the study, taking into account sources of potential bias or imprecision. Discuss both direction and magnitude of any potential bias<br><b>Page 19</b>                                                                                                                                                                                                                                                                                                                     |
| Interpretation           | 20  | Give a cautious overall interpretation of results considering objectives, limitations, multiplicity of analyses, results from similar studies, and other relevant evidence<br><b>Pages 17-19</b>                                                                                                                                                                                                                                                                                                 |
| Generalisability         | 21  | Discuss the generalisability (external validity) of the study results<br><b>Page 19</b>                                                                                                                                                                                                                                                                                                                                                                                                          |
| <b>Other information</b> |     |                                                                                                                                                                                                                                                                                                                                                                                                                                                                                                  |
| Funding                  | 22  | Give the source of funding and the role of the funders for the present study and, if applicable, for the original study on which the present article is based<br><b>Page 20</b>                                                                                                                                                                                                                                                                                                                  |

1  
2 \*Give information separately for cases and controls in case-control studies and, if applicable, for exposed and  
3 unexposed groups in cohort and cross-sectional studies.  
4

5 **Note:** An Explanation and Elaboration article discusses each checklist item and gives methodological background and  
6 published examples of transparent reporting. The STROBE checklist is best used in conjunction with this article (freely  
7 available on the Web sites of PLoS Medicine at <http://www.plosmedicine.org/>, Annals of Internal Medicine at  
8 <http://www.annals.org/>, and Epidemiology at <http://www.epidem.com/>). Information on the STROBE Initiative is  
9 available at [www.strobe-statement.org](http://www.strobe-statement.org).  
10  
11  
12  
13  
14  
15  
16  
17  
18  
19  
20  
21  
22  
23  
24  
25  
26  
27  
28  
29  
30  
31  
32  
33  
34  
35  
36  
37  
38  
39  
40  
41  
42  
43  
44  
45  
46  
47  
48  
49  
50  
51  
52  
53  
54  
55  
56  
57  
58  
59  
60
